# Supplementary material
Source: PubMed Central journal article supplement (PMC3084003)

## DATA SUPPLEMENT

# ***TET2* mutations improve the new European LeukemiaNet risk classification of acute myeloid leukemia: A Cancer and Leukemia Group B study**

Klaus H. Metzeler,<sup>1</sup> Kati Maharry,<sup>1,2</sup> Michael D. Radmacher,<sup>1,2</sup> Krzysztof Mrózek,<sup>1</sup> Dean Margeson,<sup>1,2</sup> Heiko Becker,<sup>1</sup> John Curfman,<sup>1</sup> Kelsi B. Holland,<sup>1,2</sup> Sebastian Schwind,<sup>1</sup> Susan P. Whitman,<sup>1</sup> Yue-Zhong Wu,<sup>1</sup> William Blum,<sup>1</sup> Bayard L. Powell,<sup>3</sup> Thomas H. Carter,<sup>4</sup> Meir Wetzler,<sup>5</sup> Joseph O. Moore,<sup>6</sup> Jonathan E. Kolitz,<sup>7</sup> Maria R. Baer,<sup>8</sup> Andrew J. Carroll,<sup>9</sup> Richard A. Larson,<sup>10</sup> Michael A. Caligiuri,<sup>1</sup> Guido Marcucci,<sup>1,\*</sup> and Clara D. Bloomfield<sup>1,\*</sup>

1. The Ohio State University Comprehensive Cancer Center, Columbus, OH
2. The Cancer and Leukemia Group B Statistical Center, Duke University Medical Center, Durham, NC
3. Comprehensive Cancer Center of Wake Forest University, Winston-Salem, NC
4. University of Iowa, Iowa City, IA
5. Roswell Park Cancer Institute, Buffalo, NY
6. Duke University Medical Center, Durham, NC
7. North Shore University Hospital, Manhasset, NY
8. Greenebaum Cancer Center, University of Maryland, Baltimore, MD
9. Department of Genetics, University of Alabama at Birmingham, Birmingham, AL
10. The University of Chicago Medical Center, Chicago, IL

\* These senior authors contributed equally to this work.

**Grant support:** This work was supported in part by the National Cancer Institute (grants CA101140, CA114725, CA140158, CA31946, CA33601, CA16058, CA77658 and CA129657), the Coleman Leukemia Research Foundation, and the Deutsche Krebshilfe–Dr Mildred Scheel Cancer Foundation (H.B.).

**Corresponding author:**

Clara D. Bloomfield, MD, The Ohio State University, Comprehensive Cancer Center, 1216 James Cancer Hospital, 300 West 10<sup>th</sup> Ave, Columbus, OH 43210; e-mail: [clara.bloomfield@osumc.edu](mailto:clara.bloomfield@osumc.edu)

## **PATIENTS AND METHODS**

### ***Treatment Protocols, Sample Collection and Sample Preparation***

Patients with cytogenetically normal acute myeloid leukemia (CN-AML) younger than 60 years were treated on Cancer and Leukemia Group B (CALGB) trials 9621 or 19808. Patients enrolled on CALGB 19808 (n=96) were randomly assigned to receive induction chemotherapy with cytarabine, daunorubicin, and etoposide with or without PSC-833 (valsopodar), a multidrug resistance protein inhibitor.<sup>1</sup> On achievement of complete remission (CR), patients were assigned to intensification with high-dose cytarabine and etoposide for stem-cell mobilization followed by myeloablative treatment with busulfan and etoposide supported by autologous peripheral blood stem-cell transplantation. Patients enrolled on CALGB 9621 (n=87) were treated similarly to those on CALGB 19808, as previously reported.<sup>2,3</sup>

Older patients ( $\geq 60$  years) were all treated with cytarabine/daunorubicin-based induction therapy followed by cytarabine-based consolidation therapy. Patients on CALGB 8525 (n=23) were treated with induction chemotherapy consisting of cytarabine in combination with daunorubicin and were randomly assigned to consolidation with different doses of cytarabine followed by maintenance treatment.<sup>4</sup> Patients on CALGB 8923 (n=22) were treated with induction chemotherapy consisting of cytarabine in combination with daunorubicin and were randomly assigned to receive postremission therapy with cytarabine alone

or in combination with mitoxantrone.<sup>5</sup> Patients on CALGB 9420 (n=6) and 9720 (n=109) received induction chemotherapy consisting of cytarabine in combination with daunorubicin and etoposide, with (CALGB 9420) or with/without (CALGB 9720) the multidrug resistance protein modulator PSC-833.<sup>6,7</sup> Patients on CALGB 9420 received postremission therapy with cytarabine (2 g/m<sup>2</sup>/d) alone, and patients on CALGB 9720 received a single cytarabine/daunorubicin consolidation course identical to the induction regimen and were then randomly assigned to low-dose recombinant interleukin-2 maintenance therapy or none.<sup>8</sup> Patients on CALGB 10201 (n=75) received induction chemotherapy consisting of cytarabine and daunorubicin, with or without the *BCL2* antisense oblimersen sodium. The consolidation regimen included two cycles of cytarabine (2 g/m<sup>2</sup>/d) with or without oblimersen.<sup>9</sup> The frequency of *TET2* mutations did not vary significantly between study protocols when analyzed separately for younger ( $P=.84$ ) and older ( $P=.71$ ) patients.

None of the protocols included allogeneic stem cell transplantation for CN-AML patients in first CR. Patients who enrolled on the treatment protocols also provided written informed consent to participate in the companion protocols CALGB 8461 (prospective cytogenetic companion), CALGB 9665 (leukemia tissue bank) and CALGB 20202 (molecular studies in acute myeloid leukemia), which involved collection of pretreatment bone marrow (BM) aspirates, blood samples, and buccal swabs. Mononuclear cells from BM and blood samples were enriched through Ficoll-Hypaque gradient centrifugation, and cryopreserved

for later use. Genomic DNA and total RNA were extracted as described previously.<sup>10</sup> Genomic DNA from buccal swabs was isolated using the Qiagen DNEasy Blood & Tissue kit (Qiagen, Hilden, Germany). All coding exons of the longest known *TET2* transcript variant (GenBank accession no. NM\_001127208) were amplified from genomic DNA by polymerase chain reaction and analyzed by direct sequencing. Primer sequences are available upon request. Exon numbering follows the GenBank reference record.

### ***Gene- and MicroRNA-Expression Profiling***

To establish a signature of genes differentially expressed between *TET2*-mutated and *TET2* wild-type (*TET2*-wt) patients, we evaluated gene-expression profiles obtained using Affymetrix HG-U133plus2.0 oligonucleotide microarrays (Affymetrix, Santa Clara, CA). Details regarding sample preparation and array hybridization have been published previously.<sup>11,12</sup> Briefly, summary measures of gene expression were computed for each probe-set using the robust multichip average method, which incorporates quantile normalization of arrays. Expression values were logged (base 2) before analysis. A filtering step was performed to remove probe-sets that did not display significant variation in expression across arrays. In this procedure, a  $\chi^2$  test was used to test whether the observed variance in expression of a probe-set was significantly larger than the median observed variance in expression for all probe-sets, using  $\alpha=.01$  as the significance level. A total of 24,995 probe-sets passed the filtering criterion. Gene-expression signatures were then analyzed separately in the ELN

favorable-risk (41 *TET2*-mutated and 93 *TET2*-wt patients) and intermediate-I-risk (28 *TET2*-mutated and 121 *TET2*-wt patients) categories. Normalized expression values were compared between *TET2*-mutated and *TET2*-wt patients, and a univariable significance level of .001 was used to identify differentially expressed probe-sets. A global test of significance based on a permutation procedure was performed to determine whether or not the number of differentially expressed probe sets was more than expected by chance; if not, no signature is reported for the comparison.

For microRNA microarrays (The Ohio State University custom microRNA array version 4.0), signal intensities were calculated for each spot, with an adjustment made for local background. Spots that were flagged due to low signal-to-noise ratio on more than 75% of arrays were excluded from analysis. Signal intensities were log-transformed and quantile normalization was performed on arrays using spots for all human and mouse microRNA probes represented on the array. Log-signal intensities from replicate spots (ie, spots representing the same probe) were averaged. For each microRNA probe, an adjustment was made for batch effects (ie, differences in expression related to the batch in which arrays were hybridized). Further analysis was limited to 460 unique human probes that passed the filtering criterion. Separate microRNA signatures were obtained in the ELN favorable-risk (28 *TET2*-mutated and 50 *TET2*-wt patients) and in the intermediate-I-risk (21 *TET2*-mutated and 79 *TET2*-wt patients) subgroups. A comparison of microRNA expression was made between *TET2*-mutated and

TET2-wt patients, using a univariable significance level of .005 to identify differentially expressed microRNA probes. A global test of significance based on a permutation procedure was performed to determine whether or not the number of differentially expressed probes was more than expected by chance; if not, no signature is reported for the comparison. All microarray analyses were performed using BRB-ArrayTools Version 3.8.1, developed by Richard Simon, DSc, and Amy Peng Lam.

### ***Definition of Clinical Endpoints***

Clinical endpoints were defined, in accordance with generally accepted criteria,<sup>13</sup> as follows. CR required a BM aspirate with cellularity greater than 20% and maturation of all cell lines, less than 5% blasts and no Auer rods; in the peripheral blood, an absolute neutrophil count of  $\geq 1,500/\mu\text{L}$ , platelet count of  $\geq 100,000/\mu\text{L}$ , and no leukemic blasts; and no evidence of extramedullary leukemia, all of which had to persist for at least 1 month. Relapse was defined by the presence of  $\geq 5\%$  BM blasts, or circulating leukemic blasts, or the development of extramedullary leukemia. Overall survival (OS) was measured from the date of study entry until the date of death, and patients alive at last follow-up were censored. Disease-free survival (DFS) was measured from the date of CR until the date of relapse or death; patients alive and in complete remission were censored at last follow-up. Event-free survival (EFS) was measured from the date of study entry until induction failure, relapse or death; patients alive and in complete remission were censored at last follow-up.

### **Multivariable Analyses**

Multivariable logistic regression models were generated for attainment of CR, and proportional hazards models were constructed for EFS, DFS and OS, using a limited backwards elimination procedure. Since we found a significant interaction between *TET2* mutation status and European LeukemiaNet (ELN) risk group assignment for all four endpoints, this interaction term was included in all multivariable models. Variables considered for model inclusion and evaluated in univariable models were: *TET2* mutation status, ELN risk group assignment (based on the presence/absence of *FLT3* internal tandem duplications [*FLT3*-ITD]), and *NPM1* and *CEBPA* mutations), *TET2* mutation-by-ELN risk group interaction, *WT1* mutation status, *FLT3* tyrosine kinase domain mutation status, *MLL* partial tandem duplication status, age group (<60 v ≥60 years), sex, race, hemoglobin, platelet count, and white blood count (WBC). Age was considered as a dichotomous rather than as a continuous variable, based on an analysis of Martingale residuals for the continuous age regressed against survival. Additionally, the use of an age cut-off at 60 years allowed us to account for the fact that patients below and above that age were enrolled on different treatment protocols. Variables significant at  $\alpha=.20$  from the univariable analyses were considered for multivariable analyses. For the time-to-event endpoints, the proportional hazards assumption was checked for each variable individually. If the proportional hazards assumption was not met for a particular variable, then an artificial time-dependent covariate was included in all models that contained that variable.

## RESULTS

### ***Spectrum of TET2 Mutations in CN-AML and Analysis of Matched Germline DNA Samples***

Overall, 141 variations from the reference sequence were found in the *TET2* coding sequence and adjacent splice sites in 104 of 427 patients (Table A1). Sixty-two patients had a single, heterozygous *TET2* sequence variation, while 42 patients had more than one variation. We observed a striking heterogeneity of *TET2* sequence variations: only 5 specific variations occurred in more than one patient in our cohort.

As in previous reports,<sup>14-16</sup> we did not identify “hot spots” for nonsense and frame shift variations, which were distributed across all coding exons. Of 102 nonsense, frame shift and splice site variations, matched buccal swab or remission BM DNA samples were available for 72. Seventy-one variations were found to be somatic mutations, whereas only one nonsense change was also detected in the corresponding germline sample. However, the same change (c.4393C>T; p.Arg1465X) was confirmed to be a somatically acquired mutation in three other patients. All nonsense, frame shift and splice site mutations were therefore included in further analyses.

After excluding known single nucleotide polymorphisms listed in the dbSNP database (available online at <http://www.ncbi.nlm.nih.gov/projects/SNP/>) or



detected in a cohort of healthy controls,<sup>14</sup> we detected 37 missense variations, leading to changes of single amino acids. Twenty-eight missense changes clustered within two evolutionarily conserved regions of the *TET2* gene, which encompass codons 1104 to 1478 and 1845 to 2002 (see Fig 1 in the main text).<sup>14</sup> Of these 28 missense variations inside the conserved domains, all 16 for which germline DNA could be evaluated were confirmed to be somatically acquired mutations. Therefore, all missense variations within the two evolutionarily conserved regions were retained in further analyses. In contrast, of the 9 missense variations outside the conserved domains, all 7 that could be tested were present in the germline. To our knowledge, these germline variations, causing changes in single amino acids, have not been described in healthy subjects or cancer patients. It remains undetermined whether they represent innocent polymorphisms or disease-relevant mutations. Therefore, all 9 patients with missense variations outside the two evolutionarily conserved domains were excluded from further analyses.

### ***Applicability of the ELN Risk Classification to Our Patient Cohort***

The ELN recently proposed a standardized reporting system which classifies CN-AML patients into favorable-risk and intermediate-I-risk categories based on presence or absence of *CEBPA* mutations, *NPM1* mutations and *FLT3-ITD*.<sup>17</sup> Since this classification scheme is relatively new, we evaluated the prognostic separation achieved by applying the ELN risk categories to our cohort of CN-AML patients. Patients in the favorable-risk group (n=199) had longer EFS than

patients in the intermediate-I-risk group (n=219) ( $P<.001$ ; 3-year EFS rates, 42% v 9%). Favorable-risk patients also had a higher CR rate (85% v 65%,  $P<.001$ ), longer DFS ( $P<.001$ ; Fig A4A; 3-year DFS rates, 47% v 14%) and longer OS ( $P<.001$ ; Fig A4B; 3-year OS rates, 54% v 19%), as compared with the intermediate-I-risk group. These results indicate that the ELN risk classification identified subgroups with significantly different outcomes in our cohort.

### ***Prognostic Relevance of TET2 Mutations in Molecular Subsets Within the ELN Favorable-Risk and Intermediate-I-Risk Groups***

The ELN favorable-risk group includes CN-AML patients with two distinct genotypes that were previously shown to be associated with favorable outcomes: 1) CN-AML patients with mutated *NPM1* without *FLT3*-ITD, and 2) those with mutated *CEBPA* (Table A2).<sup>18</sup> Consequently, we investigated whether the association of *TET2* mutations with inferior outcomes was consistent across both these genetic subgroups (Table A6). Among patients with mutated *NPM1* without *FLT3*-ITD, there was an association of *TET2* mutations with shorter EFS in comparison with *TET2*-wt patients ( $P=.003$ ). *TET2*-mutated patients also had lower CR rates ( $P=.02$ ), shorter DFS ( $P=.046$ ; Fig A5A), and showed a trend towards shorter OS ( $P=.07$ ; Fig A5B).

Similarly, among *CEBPA*-mutated patients, those with a *TET2* mutation had shorter EFS than *TET2*-wt patients ( $P=.009$ ; Table A6). The CR rate was 75% for *CEBPA*-mutated/*TET2*-mutated and 88% for *CEBPA*-mutated/*TET2*-wt patients

( $P=.27$ ). *TET2* mutations were associated with shorter DFS ( $P=.03$ ; Fig A5C) and OS ( $P=.003$ ; Fig A5D) among *CEBPA*-mutated patients.

Finally, we also tested for an interaction between age group and *TET2* mutation status among our ELN favorable-risk cases. We found that the association of *TET2* mutations with outcomes did not differ significantly between older and younger patients (EFS,  $P=.98$ ; CR,  $P=.98$ ; DFS,  $P=.97$ ; OS,  $P=.79$ ).

The ELN intermediate-I-risk group comprises all those CN-AML patients that are not assigned to the favorable-risk category. Consequently, patients in the intermediate-I-group may have one of three different genotypes: 1) Mutated *NPM1* and *FLT3*-ITD and wild-type *CEBPA*, or 2) wild-type *NPM1* and *FLT3*-ITD and wild-type *CEBPA*, or 3) wild-type *NPM1* without *FLT3*-ITD and wild-type *CEBPA*. Following the ELN recommendations, we explored the prognostic impact of *TET2* mutations within these three subcategories (Table A7, Figure A6). We did not detect a significant association of *TET2* mutation status and outcomes in any of these subsets, although in some subgroups the number of *TET2*-mutated patients was too small to draw firm conclusions.

Overall, these results demonstrate that *TET2* mutations are associated with inferior outcomes in patients with either of the two genotypes (mutated *NPM1* without *FLT3*-ITD, or mutated *CEBPA*) that, according to the ELN guidelines, qualify a patient for the favorable-risk category. In contrast, exploratory analyses

did not show significant associations of *TET2* mutations with outcomes in the molecular subsets within the intermediate-I-risk group.

## REFERENCES

1. Kolitz JE, George SL, Marcucci G, et al: P-glycoprotein inhibition using valspodar (PSC-833) does not improve outcomes for patients under age 60 years with newly diagnosed acute myeloid leukemia: Cancer and Leukemia Group B study 19808. *Blood* 116:1413-1421, 2010
2. Kolitz JE, George SL, Dodge RK, et al: Dose escalation studies of cytarabine, daunorubicin, and etoposide with and without multidrug resistance modulation with PSC-833 in untreated adults with acute myeloid leukemia younger than 60 years: Final induction results of Cancer and Leukemia Group B Study 9621. *J Clin Oncol* 22:4290-4301, 2004
3. Kolitz JE, George SL, Barrier R, et al: A novel post-remission consolidation regimen for patients with acute myeloid leukemia (AML) < 60 years old with normal or unfavorable cytogenetics: Results from CALGB 9621. *Blood* 102:175a, 2003 (abstr 609)
4. Mayer RJ, Davis RB, Schiffer CA, et al: Intensive postremission chemotherapy in adults with acute myeloid leukemia. *N Engl J Med* 331:896-903, 1994
5. Stone R, Berg D, George S, et al: Postremission therapy in older patients with de novo acute myeloid leukemia: A randomized trial comparing mitoxantrone and intermediate-dose cytarabine with standard-dose cytarabine. *Blood* 98:548-553, 2001

6. Lee EJ, George SL, Caligiuri M, et al: Parallel phase I studies of daunorubicin given with cytarabine and etoposide with or without the multidrug resistance modulator PSC-833 in previously untreated patients 60 years of age or older with acute myeloid leukemia: Results of Cancer and Leukemia Group B study 9420. *J Clin Oncol* 17:2831-2839, 1999
7. Baer MR, George SL, Dodge RK, et al: Phase 3 study of the multidrug resistance modulator PSC-833 in previously untreated patients 60 years of age and older with acute myeloid leukemia: Cancer and Leukemia Group B Study 9720. *Blood* 100:1224-1232, 2002
8. Baer MR, George SL, Caligiuri MA, et al. Low-dose interleukin-2 immunotherapy does not improve outcome of patients age 60 years and older with acute myeloid leukemia in first complete remission: Cancer and Leukemia Group B study 9720. *J Clin Oncol* 26:4934-4939, 2008
9. Marcucci G, Moser B, Blum W, et al: A phase III randomized trial of intensive induction and consolidation chemotherapy ± oblimersen, a pro-apoptotic Bcl-2 antisense oligonucleotide in untreated acute myeloid leukemia patients >60 years old. *J Clin Oncol* 25:360s, 2007 (suppl; abstr 7012)
10. Marcucci G, Maharry K, Radmacher MD, et al: Prognostic significance of, and gene and microRNA expression signatures associated with, *CEBPA* mutations in cytogenetically normal acute myeloid leukemia with high-risk molecular features: A Cancer and Leukemia Group B study. *J Clin Oncol* 26:5078-5087, 2008

11. Marcucci G, Baldus CD, Ruppert AS, et al: Overexpression of the ETS-related gene, *ERG*, predicts a worse outcome in acute myeloid leukemia with normal karyotype: A Cancer and Leukemia Group B study. *J Clin Oncol* 23:9234-9242, 2005
12. Becker H, Marcucci G, Maharry K, et al: Favorable prognostic impact of *NPM1* mutations in older patients with cytogenetically normal de novo acute myeloid leukemia and associated gene- and microRNA-expression signatures: A Cancer and Leukemia Group B study. *J Clin Oncol* 28:596-604, 2010
13. Cheson BD, Cassileth PA, Head DR, et al: Report of the National Cancer Institute-sponsored workshop on definitions of diagnosis and response in acute myeloid leukemia. *J Clin Oncol* 8:813-819, 1990
14. Langemeijer SMC, Kuiper RP, Berends M, et al: Acquired mutations in *TET2* are common in myelodysplastic syndromes. *Nat Genet* 41:838-842, 2009
15. Delhommeau F, Dupont S, Della Valle V, et al: Mutation in *TET2* in myeloid cancers. *N Engl J Med* 360:2289-2301, 2009
16. Abdel-Wahab O, Mullally A, Hedvat C, et al: Genetic characterization of TET1, TET2, and TET3 alterations in myeloid malignancies. *Blood* 114:144-147, 2009
17. Döhner H, Estey EH, Amadori S, et al: Diagnosis and management of acute myeloid leukemia in adults: Recommendations from an international

- expert panel, on behalf of the European LeukemiaNet. *Blood* 115:453-474, 2010
18. Mrózek K, Marcucci G, Paschka P, et al: Clinical relevance of mutations and gene-expression changes in adult acute myeloid leukemia with normal cytogenetics: Are we ready for a prognostically prioritized molecular classification? *Blood* 109:431-448, 2007



**Table A1.** List of 141 Sequence Alterations in the Coding Sequence of *TET2* Detected in 104 Patients With Cytogenetically Normal Acute Myeloid Leukemia

| UPN  | Exon | cDNA Sequence Change   | Deduced Change in Protein Sequence | Finding in Matched Buccal Swab or Remission Bone Marrow Genomic DNA Sample |
|------|------|------------------------|------------------------------------|----------------------------------------------------------------------------|
| 362* | 3    | c.322T>C               | p.Gln108X                          | not tested                                                                 |
| 293  | 3    | c.434G>A               | p.Ser145Asn                        | not tested                                                                 |
| 256* | 3    | c.519delG              | p.Pro174fs                         | wild-type (buccal swab DNA)                                                |
| 380* | 3    | c.521delC              | p.Pro174fs                         | wild-type (buccal swab DNA)                                                |
| 50   | 3    | c.590_591insC          | p.Val198fs                         | wild-type (buccal swab DNA)                                                |
| 285* | 3    | c.640dupT              | p.Ser214fs                         | wild-type (buccal swab DNA)                                                |
| 249* | 3    | c.688_689delCT         | p.Leu230fs                         | wild-type (buccal swab DNA)                                                |
| 190* | 3    | c.810_816dupCTCAGGG    | p.Gln273fs                         | wild-type (buccal swab DNA)                                                |
| 342  | 3    | c.941dupG              | p.Cys314fs                         | wild-type (buccal swab DNA)                                                |
| 415  | 3    | c.942T>A               | p.Cys314X                          | not tested                                                                 |
| 352  | 3    | c.945delC              | p.Gln317fs                         | wild-type (buccal swab DNA)                                                |
| 397  | 3    | c.998delC              | p.Pro333fs                         | not tested                                                                 |
| 393* | 3    | c.1034_1037dupAGCT     | p. Gly349fs                        | not tested                                                                 |
| 286* | 3    | c.1118_1122delAAAAT    | p.Gln373fs                         | not tested                                                                 |
| 368* | 3    | c.1137_1138delTTinsC   | p.Tyr380fs                         | wild-type (buccal swab DNA)                                                |
| 272* | 3    | c.1219delT             | p.Ser407fs                         | wild-type (buccal swab DNA)                                                |
| 301  | 3    | c.1240C>T              | p.Gln414X                          | wild-type (buccal swab DNA)                                                |
| 337  | 3    | c.1669C>T              | p.Gln557X                          | wild-type (buccal swab DNA)                                                |
| 148  | 3    | c.1747G>T              | p.Glu583X                          | wild-type (buccal swab DNA)                                                |
| 79*  | 3    | c.1755delT             | p.S585fs                           | wild-type (buccal swab DNA)                                                |
| 294  | 3    | c.1842delG             | p.Leu615fs                         | not tested                                                                 |
| 79*  | 3    | c.1847dupC             | p.Pro616fs                         | wild-type (buccal swab DNA)                                                |
| 28*  | 3    | c.1851delG             | p.Arg617fs                         | wild-type (buccal swab DNA)                                                |
| 44*  | 3    | c.1860C>G              | p.Tyr620X                          | not tested                                                                 |
| 209* | 3    | c.2000_2016del17insC   | p.His667fs                         | wild-type (buccal swab DNA)                                                |
| 270  | 3    | c.2083dupA             | p.Met695fs                         | not tested                                                                 |
| 393* | 3    | c.2148dupA             | p.His717fs                         | wild-type (buccal swab DNA)                                                |
| 365  | 3    | c.2149_2150del         | p.His717fs                         | not tested                                                                 |
| 271* | 3    | c.2176_2179delCAGG     | p.Ala727fs                         | wild-type (buccal swab DNA)                                                |
| 88   | 3    | c.2218C>T              | p.Gln740X                          | wild-type (buccal swab DNA)                                                |
| 318* | 3    | c.2236C>T              | p.Gln746X                          | wild-type (buccal swab DNA)                                                |
| 313  | 3    | c.2299A>G              | <i>p.Asn767Asp</i>                 | <i>sequence change detected in buccal swab DNA sample</i>                  |
| 184* | 3    | c.2305delC             | p.Gln769fs                         | wild-type (buccal swab DNA)                                                |
| 114* | 3    | c.2428C>T              | p.Gln810X                          | wild-type (remission sample)                                               |
| 381* | 3    | c.2441delG             | p.Arg814fs                         | wild-type (buccal swab DNA)                                                |
| 251* | 3    | c.2443_2444insAT       | p.Arg815fs                         | wild-type (buccal swab DNA)                                                |
| 360* | 3    | c.2450_2454del         | p.Ser817fs                         | not tested                                                                 |
| 72*  | 3    | c.2474C>G              | p.Ser825X                          | wild-type (buccal swab DNA)                                                |
| 358* | 3    | c.2497delT             | p.Ser833fs                         | not tested                                                                 |
| 114* | 3    | c.2527G>T              | p.Glu843X                          | wild-type (remission sample)                                               |
| 153* | 3    | c.2604T>G              | p.Phe868Leu                        | not tested                                                                 |
| 401  | 3    | c.2692G>T <sup>†</sup> | p.Gly898X                          | not tested                                                                 |
| 109  | 3    | c.2746C>T <sup>†</sup> | p.Gln916X                          | wild-type (buccal swab DNA)                                                |

TET2 mutations improve the ELN classification of AML – Data Supplement

| UPN  | Exon | cDNA Sequence Change          | Deduced Change in Protein Sequence | Finding in Matched Buccal Swab or Remission Bone Marrow Genomic DNA Sample               |
|------|------|-------------------------------|------------------------------------|------------------------------------------------------------------------------------------|
| 228  | 3    | c.2746C>T                     | p.Gln916X                          | wild-type (buccal swab DNA)                                                              |
| 353  | 3    | c.2746C>T                     | p.Gln916X                          | wild-type (buccal swab DNA)                                                              |
| 373  | 3    | c.2855dupT                    | p.Leu952fs                         | wild-type (buccal swab DNA)                                                              |
| 120  | 3    | c.2862G>R                     | p.Trp954X                          | wild-type (buccal swab DNA)                                                              |
| 364* | 3    | c.2878C>T                     | p.Gln960X                          | wild-type (buccal swab DNA)                                                              |
| 288  | 3    | c.2896C>T                     | p.Gln966X                          | wild-type (buccal swab DNA)                                                              |
| 174* | 3    | c.2918dupG                    | p.S972fs                           | wild-type (buccal swab DNA)                                                              |
| 386  | 3    | c.2964_2982dup                | p.Thr995fs                         | not tested                                                                               |
| 59   | 3    | c.3030G>T                     | p.Glu1010Asp                       | <i>sequence change detected in bone marrow sample obtained during complete remission</i> |
| 282  | 3    | c.3237delAinsCCC <sup>†</sup> | p.Ala1080fs                        | not tested                                                                               |
| 256* | 3    | c.3344delC                    | p.Pro1115fs                        | wild-type (buccal swab DNA)                                                              |
| 172* | 3    | c.3409+1G>A                   | p.?                                | wild-type (buccal swab DNA)                                                              |
| 309  | 3c   | c.3448delC                    | p.His1150fs                        | wild-type (buccal swab DNA)                                                              |
| 362* | 3c   | c.3500+2T>C                   | p.?                                | not tested                                                                               |
| 358* | 4    | c.3528delG                    | p.Ile1177fs                        | not tested                                                                               |
| 184* | 4    | c.3535dupA                    | p.Arg1179fs                        | wild-type (buccal swab DNA)                                                              |
| 187* | 4    | c.3535dupA                    | p.Arg1179fs                        | wild-type (buccal swab DNA)                                                              |
| 286* | 4    | c.3594+3A>G                   | p.?                                | not tested                                                                               |
| 92   | 5    | c.3604A>T                     | p.Arg1202X                         | wild-type (buccal swab DNA)                                                              |
| 247  | 5    | c.3632G>A                     | p.Cys1211Tyr                       | wild-type (buccal swab DNA)                                                              |
| 96   | 5    | c.3643dupG                    | p.Glu1215fs                        | wild-type (buccal swab DNA)                                                              |
| 145  | 5    | c.3646C>T                     | p.Arg1216X                         | wild-type (buccal swab DNA)                                                              |
| 28*  | 5    | c.3656A>G                     | p.His1219Arg                       | wild-type (buccal swab DNA)                                                              |
| 272* | 5    | c.3657C>G                     | p.His1219Gln                       | wild-type (buccal swab DNA)                                                              |
| 280* | 5    | c.3729delA                    | p.Lys1243fs                        | not tested                                                                               |
| 44*  | 5    | c.3732_3733delCT              | p.Tyr1245fs                        | wild-type (buccal swab DNA)                                                              |
| 115* | 5    | c.3781C>T                     | p.Arg1261Cys                       | not tested, but somatically acquired mutation in two other patients                      |
| 249* | 5    | c.3781C>T                     | p.Arg1261Cys                       | wild-type (buccal swab DNA)                                                              |
| 364* | 5    | c.3781C>T                     | p.Arg1261Cys                       | wild-type (buccal swab DNA)                                                              |
| 345  | 5    | c.3787T>C                     | p.Cys1263Arg                       | wild-type (buccal swab DNA)                                                              |
| 426* | 5    | c.3787T>G                     | p.Cys1263Gly                       | not tested, but somatically acquired mutation at same codon in one other patient         |
| 233  | 5    | c.3790G>C <sup>†</sup>        | p.Ala1264Pro                       | not tested                                                                               |
| 93   | 6    | c.3812dupG                    | p.Cys1271fs                        | wild-type (buccal swab DNA)                                                              |
| 231  | 6    | c.3818G>C                     | p.Cys1273Ser                       | not tested                                                                               |
| 419  | 6    | c.3866G>A                     | p.Cys1289Tyr                       | wild-type (buccal swab DNA)                                                              |
| 284* | 6    | c.3885delC                    | p.Tyr1295X                         | wild-type (buccal swab DNA)                                                              |
| 252  | 6    | c.3893G>A                     | p.Cys1298Tyr                       | wild-type (buccal swab DNA)                                                              |
| 400* | 6    | c.3893G>A                     | p.Cys1298Tyr                       | not tested, but somatically acquired mutation in one other patient                       |
| 297  | 6    | c.3908G>A                     | p.Ser1303Asn                       | not tested                                                                               |
| 90   | 6    | c.3921delG                    | p.Arg1307fs                        | wild-type (buccal swab DNA)                                                              |
| 153* | 6    | c.3954+1G>A                   | p.?                                | not tested                                                                               |
| 271* | 7    | c.3957delA                    | p.Glu1320fs                        | wild-type (buccal swab DNA)                                                              |

TET2 mutations improve the ELN classification of AML – Data Supplement

| UPN  | Exon | cDNA Sequence Change   | Deduced Change in Protein Sequence | Finding in Matched Buccal Swab or Remission Bone Marrow Genomic DNA Sample            |
|------|------|------------------------|------------------------------------|---------------------------------------------------------------------------------------|
| 277  | 7    | c.4005_4009delInsTG    | p.Thr1336_Tyr1337delinsAsp         | wild-type (buccal swab DNA)                                                           |
| 378  | 7    | c.4011_4012insGTAT     | p.Lys1338fs                        | wild-type (buccal swab DNA)                                                           |
| 380* | 7    | c.4011T>A              | p.Tyr1337X                         | wild-type (buccal swab DNA)                                                           |
| 185  | 7    | c.4044+1G>C            | p.?                                | wild-type (buccal swab DNA)                                                           |
| 72*  | 7    | c.4044+1G>T            | p.?                                | wild-type (buccal swab DNA)                                                           |
| 193  | 7    | c.4044+2dupT           | p.?                                | wild-type (buccal swab DNA)                                                           |
| 162  | 8    | c.4082G>A <sup>†</sup> | p.Gly1361Asp                       | wild-type (buccal swab DNA)                                                           |
| 164  | 8    | c.4087A>T              | p.Lys1363X                         | wild-type (buccal swab DNA)                                                           |
| 402* | 8    | c.4097G>A              | p.Arg1366His                       | not tested                                                                            |
| 55   | 8    | c.4102T>C              | p.Phe1368Leu                       | wild-type (buccal swab DNA)                                                           |
| 384  | 8    | c.4128C>G              | p.Asp1376Glu                       | wild-type (buccal swab DNA)                                                           |
| 153* | 8    | c.4138C>T              | p.His1380Tyr                       | not tested                                                                            |
| 209* | 8    | c.4144C>T              | p.His1382Tyr                       | wild-type (buccal swab DNA)                                                           |
| 172* | 8    | c.4148delG             | p.Arg1383fs                        | wild-type (buccal swab DNA)                                                           |
| 368* | 8    | c.4167_4168dupGA       | p.Asn1390fs                        | wild-type (buccal swab DNA)                                                           |
| 433  | 8    | c.4182+2dupT           | p.?                                | not tested                                                                            |
| 430  | 9    | c.4183-1G>C            | p.?                                | not tested                                                                            |
| 360* | 9    | c.4249G>T              | p.Val1417Phe                       | not tested, but described as somatically acquired mutation in Abdel-Wahab et al. 2009 |
| 317  | 9    | c.4317delA             | p.Lys1439fs                        | wild-type (buccal swab DNA)                                                           |
| 318* | 9    | c.4317dupA             | p.Arg1440fs                        | wild-type (buccal swab DNA)                                                           |
| 400* | 9    | c.4317dupA             | p.Arg1440fs                        | not tested, but somatically acquired mutation in one other patient                    |
| 64   | 9    | c.4393C>T              | p.Arg1465X                         | wild-type (buccal swab DNA)                                                           |
| 73   | 9    | c.4393C>T              | p.Arg1465X                         | sequence change detected in buccal swab DNA sample                                    |
| 174* | 9    | c.4393C>T              | p.Arg1465X                         | wild-type (buccal swab DNA)                                                           |
| 381* | 9    | c.4393C>T              | p.Arg1465X                         | wild-type (buccal swab DNA)                                                           |
| 280* | 9    | c.4501C>T              | p.Gln1501X                         | not tested                                                                            |
| 142  | 9    | c.4513G>A              | p.Ala1505Thr                       | sequence change detected in buccal swab DNA sample                                    |
| 11   | 10   | c.4824T>G              | p.Tyr1608X                         | wild-type (buccal swab DNA)                                                           |
| 264* | 10   | c.4887_4936dup         | p.Leu1646fs                        | not tested                                                                            |
| 251* | 10   | c.4925delG             | p.Cys1642fs                        | wild-type (buccal swab DNA)                                                           |
| 285* | 10   | c.4977T>G              | p.Tyr1659X                         | wild-type (buccal swab DNA)                                                           |
| 308  | 10   | c.5089G>A              | p.Gly1697Arg                       | sequence change detected in buccal swab DNA sample                                    |
| 284* | 10   | c.5128_5131delACCA     | p.Thr1710fs                        | wild-type (buccal swab DNA)                                                           |
| 14   | 10   | c.5152G>T              | p.Val1718Leu                       | sequence change detected in buccal swab DNA sample                                    |
| 97   | 10   | c.5152G>T              | p.Val1718Leu                       | sequence change detected in buccal swab DNA sample                                    |
| 173  | 10   | c.5162T>A or G>A       | p.L1721X                           | wild-type (buccal swab DNA)                                                           |
| 357  | 10   | c.5219T>G              | p.Leu1740X                         | not tested                                                                            |
| 216  | 10   | c.5283delC             | p.His1761fs                        | wild-type (buccal swab DNA)                                                           |
| 402* | 10   | c.5338delC             | p.Leu1780fs                        | not tested                                                                            |
| 367  | 10   | c.5374delC             | p.His1792fs                        | wild-type (buccal swab DNA)                                                           |
| 17   | 10   | c.5456_5457insGGGAC    | p.Ser1820fs                        | wild-type (buccal swab DNA)                                                           |

| UPN  | Exon | cDNA Sequence Change   | Deduced Change in Protein Sequence | Finding in Matched Buccal Swab or Remission Bone Marrow Genomic DNA Sample |
|------|------|------------------------|------------------------------------|----------------------------------------------------------------------------|
| 253  | 10   | c.5482C>T              | p.Gln1828X                         | wild-type (buccal swab DNA)                                                |
| 2    | 10   | c.5497G>A              | p.Val1833Ile                       | sequence change detected in buccal swab DNA sample                         |
| 287  | 10   | c.5540G>A <sup>†</sup> | p.Trp1847X                         | not tested                                                                 |
| 264* | 10   | c.5603A>C              | p.His1868Pro                       | not tested                                                                 |
| 183  | 10   | c.5618T>C              | p.I1873T                           | wild-type (buccal swab DNA)                                                |
| 187* | 10   | c.5627C>T              | p.Ala1876Val                       | wild-type (buccal swab DNA)                                                |
| 245  | 10   | c.5644G>C              | p.Ala1882Pro                       | wild-type (buccal swab DNA)                                                |
| 190* | 10   | c.5645_5646delCC       | p.Ala1882fs                        | wild-type (buccal swab DNA)                                                |
| 146* | 10   | c.5665_5670delCCCAAT   | p.Pro1889_Asn1890del               | not tested                                                                 |
| 115* | 10   | c.5675dupA             | p.Asn1892fs                        | not tested                                                                 |
| 146* | 10   | c.5681C>A              | p.Pro1894His                       | not tested                                                                 |
| 154  | 10   | c.5696T>C              | p.Leu1899Pro                       | wild-type (buccal swab DNA)                                                |
| 374  | 10   | c.5750G>A              | p.Trp1917X                         | wild-type (buccal swab DNA)                                                |
| 421  | 10   | c.5885C>T              | p.Pro1962Leu                       | not tested                                                                 |
| 426* | 10   | c.5950_5957del         | p.Val1984fs                        | wild-type (buccal swab DNA)                                                |

**ABBREVIATION:** UPN, unique patient number.

**NOTE:** Mutation nomenclature on the cDNA level follows the recommendations of the Human Genome Variation Society (HGVS) and is based on the reference sequence for *TET2* transcript variant 1 (NCBI GeneBank accession number NM\_001127208). Exon numbering is also based on the NCBI reference transcript. The descriptions of changes on the protein level were deduced from the cDNA sequence alterations.

\* This patient had more than one sequence alteration.

† This mutation appeared homozygous on the sequencing chromatogram, indicating that either both alleles were affected or the remaining wild-type allele was lost.

**Table A2.** Clinical and Molecular Characteristics According to *TET2* Mutation Status in 199 Patients with Primary Cytogenetically Normal Acute Myeloid Leukemia Classified in the ELN Favorable-Risk Category

| Variable                                   | <i>TET2</i> Mutated<br>n=53 | <i>TET2</i> Wild-Type<br>n=146 | <i>P</i> |
|--------------------------------------------|-----------------------------|--------------------------------|----------|
| <b>Age, years</b>                          |                             |                                | <.001    |
| Median                                     | 66                          | 56                             |          |
| Range                                      | 29-79                       | 19-81                          |          |
| <b>Age group, no. (%)</b>                  |                             |                                | <.001    |
| <60 years                                  | 14 (26)                     | 79 (54)                        |          |
| ≥60 years                                  | 39 (74)                     | 67 (46)                        |          |
| <b>Female sex, no. (%)</b>                 | 28 (53)                     | 74 (51)                        | .87      |
| <b>Race, no. (%)</b>                       |                             |                                | 1.0      |
| White                                      | 46 (90)                     | 130 (90)                       |          |
| Nonwhite                                   | 5 (10)                      | 15 (10)                        |          |
| <b>Hemoglobin, g/dL</b>                    |                             |                                | .32      |
| Median                                     | 9.3                         | 9.5                            |          |
| Range                                      | 6.7-11.9                    | 4.8-13.4                       |          |
| <b>Platelet count, x10<sup>9</sup>/L</b>   |                             |                                | .64      |
| Median                                     | 60                          | 68                             |          |
| Range                                      | 8-510                       | 7-481                          |          |
| <b>WBC count, x10<sup>9</sup>/L</b>        |                             |                                | .04      |
| Median                                     | 33.2                        | 23.4                           |          |
| Range                                      | 2.2-450.0                   | 0.9-295.0                      |          |
| <b>Percentage of blood blasts</b>          |                             |                                | .40      |
| Median                                     | 46                          | 52                             |          |
| Range                                      | 0-95                        | 0-97                           |          |
| <b>Percentage of bone marrow blasts</b>    |                             |                                | .69      |
| Median                                     | 67                          | 65                             |          |
| Range                                      | 11-94                       | 10-98                          |          |
| <b>FAB category, no. (%)</b>               |                             |                                | ---      |
| M0                                         | 0 (0)                       | 1 (1)                          |          |
| M1                                         | 7 (20)                      | 25 (25)                        |          |
| M2                                         | 12 (34)                     | 30 (30)                        |          |
| M4                                         | 9 (26)                      | 24 (24)                        |          |
| M5                                         | 7 (20)                      | 19 (19)                        |          |
| M6                                         | 0 (0)                       | 2 (2)                          |          |
| <b>Extramedullary involvement, no. (%)</b> | 14 (26)                     | 41 (29)                        | .73      |

| Variable                                        | <b>TET2 Mutated</b><br>n=53 | <b>TET2 Wild-Type</b><br>n=146 | <b>P</b> |
|-------------------------------------------------|-----------------------------|--------------------------------|----------|
| <b>IDH1, no. (%)</b>                            |                             |                                | .001     |
| Mutated                                         | 1 (2)                       | 28 (19)                        |          |
| Wild-type                                       | 51 (98)                     | 118 (81)                       |          |
| <b>IDH2, no. (%)</b>                            |                             |                                | <.001    |
| Mutated                                         | 1 (2)                       | 30 (21)                        |          |
| - Codon R140 mutation                           | 1                           | 30                             |          |
| - Codon R172 mutation                           | 0                           | 0                              |          |
| Wild-type                                       | 51 (98)                     | 116 (79)                       |          |
| <b>CEBPA, no. (%)</b>                           |                             |                                | .23      |
| Mutated                                         | 20 (38)                     | 42 (29)                        |          |
| Wild-type <sup>†</sup>                          | 32 (62)                     | 102 (71)                       |          |
| <b>NPM1, no. (%)</b>                            |                             |                                | .46      |
| Mutated                                         | 38 (72)                     | 112 (77)                       |          |
| Wild-type                                       | 15 (28)                     | 34 (23)                        |          |
| <b>FLT3-ITD, no. (%)</b>                        |                             |                                | .59      |
| Present                                         | 6 (11)                      | 13 (9)                         |          |
| Absent                                          | 47 (89)                     | 133 (91)                       |          |
| <b>Combined FLT3-ITD/NPM1 genotype, no. (%)</b> |                             |                                | .21      |
| NPM1 mutated and no FLT3-ITD                    | 34 (64)                     | 108 (74)                       |          |
| NPM1 wild-type and/or FLT3-ITD*                 | 19 (36)                     | 38 (26)                        |          |
| <b>FLT3-TKD, no. (%)</b>                        |                             |                                | .63      |
| Present                                         | 5 (9)                       | 19 (13)                        |          |
| Absent                                          | 48 (91)                     | 126 (87)                       |          |
| <b>WT1, no. (%)</b>                             |                             |                                | 1.0      |
| Mutated                                         | 3 (6)                       | 10 (7)                         |          |
| Wild-type                                       | 50 (94)                     | 136 (93)                       |          |
| <b>MLL-PTD, no. (%)</b>                         |                             |                                | .36      |
| Present                                         | 3 (7)                       | 4 (3)                          |          |
| Absent                                          | 39 (93)                     | 128 (97)                       |          |

**ABBREVIATIONS:** ELN, European LeukemiaNet; WBC, white blood count; FAB, French-American-British classification; FLT3-ITD, internal tandem duplication of the FLT3 gene; FLT3-TKD, tyrosine kinase domain mutation in the FLT3 gene; MLL-PTD, partial tandem duplication of the MLL gene.

\* By definition of the ELN favorable-risk category, all of these patients had CEBPA mutations.

† By definition of the ELN favorable-risk category, all of these patients had mutated NPM1 without FLT3-ITD.

**Table A3.** List of Affymetrix Probe-Sets Differentially Expressed Between *TET2*-Mutated and *TET2*-Wild-Type Cytogenetically Normal Acute Myeloid Leukemia Patients Classified in the ELN Favorable-Risk Category

| Probe-sets upregulated in <i>TET2</i> -mutated patients |                 |                                                                                  |             |          |                |                 |
|---------------------------------------------------------|-----------------|----------------------------------------------------------------------------------|-------------|----------|----------------|-----------------|
| Affymetrix Probe-Set                                    | Gene Symbol     | Description                                                                      | Fold Change | P        | Entrez Gene ID | Chromosome Band |
| <a href="#">232985_s_at</a>                             | <i>DPPA4</i>    | developmental pluripotency associated 4                                          | <b>2.78</b> | 3.40E-04 | 55211          | 3q13.13         |
| <a href="#">210254_at</a>                               | <i>MS4A3</i>    | membrane-spanning 4-domains, subfamily A, member 3 (hematopoietic cell-specific) | <b>2.70</b> | 2.59E-04 | 932            | 11q12.1         |
| <a href="#">212843_at</a>                               | <i>NCAM1</i>    | neural cell adhesion molecule 1                                                  | <b>2.56</b> | 1.00E-07 | 4684           | 11q23.1         |
| <a href="#">1554892_a_at</a>                            | <i>MS4A3</i>    | membrane-spanning 4-domains, subfamily A, member 3 (hematopoietic cell-specific) | <b>2.44</b> | 2.36E-04 | 932            | 11q12.1         |
| <a href="#">218589_at</a>                               | <i>LPAR6</i>    | lysophosphatidic acid receptor 6                                                 | <b>2.44</b> | 4.90E-05 | 10161          | 13q14           |
| <a href="#">230550_at</a>                               | <i>MS4A6A</i>   | membrane-spanning 4-domains, subfamily A, member 6A                              | <b>2.27</b> | 3.64E-04 | 64231          | 11q12.1         |
| <a href="#">219666_at</a>                               | <i>MS4A6A</i>   | membrane-spanning 4-domains, subfamily A, member 6A                              | <b>2.22</b> | 1.02E-04 | 64231          | 11q12.1         |
| <a href="#">227388_at</a>                               | <i>TUSC1</i>    | tumor suppressor candidate 1                                                     | <b>2.22</b> | 7.90E-06 | 286319         | 9p21.2          |
| <a href="#">224356_x_at</a>                             | <i>MS4A6A</i>   | membrane-spanning 4-domains, subfamily A, member 6A                              | <b>2.17</b> | 8.50E-04 | 64231          | 11q12.1         |
| <a href="#">223280_x_at</a>                             | <i>MS4A6A</i>   | membrane-spanning 4-domains, subfamily A, member 6A                              | <b>2.13</b> | 7.39E-04 | 64231          | 11q12.1         |
| <a href="#">227394_at</a>                               | <i>NCAM1</i>    | neural cell adhesion molecule 1                                                  | <b>2.13</b> | < 1E-07  | 4684           | 11q23.1         |
| <a href="#">201425_at</a>                               | <i>ALDH2</i>    | aldehyde dehydrogenase 2 family (mitochondrial)                                  | <b>2.08</b> | 1.04E-04 | 217            | 12q24.2         |
| <a href="#">223922_x_at</a>                             | <i>MS4A6A</i>   | membrane-spanning 4-domains, subfamily A, member 6A                              | <b>2.08</b> | 3.92E-04 | 64231          | 11q12.1         |
| <a href="#">225331_at</a>                               | <i>CCDC50</i>   | coiled-coil domain containing 50                                                 | <b>2.08</b> | 7.50E-06 | 152137         | 3q28            |
| <a href="#">203476_at</a>                               | <i>TPBG</i>     | trophoblast glycoprotein                                                         | <b>2.00</b> | 8.03E-05 | 7162           | 6q14-q15        |
| <a href="#">244297_at</a>                               | <i>ANKRD18A</i> | ankyrin repeat domain 18A                                                        | <b>1.96</b> | 3.93E-04 | 253650         | 9p13.1          |
| <a href="#">232725_s_at</a>                             | <i>MS4A6A</i>   | membrane-spanning 4-domains, subfamily A, member 6A                              | <b>1.92</b> | 5.33E-05 | 64231          | 11q12.1         |
| <a href="#">228155_at</a>                               | <i>C10orf58</i> | chromosome 10 open reading frame 58                                              | <b>1.89</b> | < 1E-07  | 84293          | 10q23.1         |
| <a href="#">206440_at</a>                               | <i>LIN7A</i>    | lin-7 homolog A (C. elegans)                                                     | <b>1.85</b> | 4.03E-04 | 8825           | 12q21           |
| <a href="#">219651_at</a>                               | <i>DPPA4</i>    | developmental pluripotency associated 4                                          | <b>1.85</b> | 1.53E-04 | 55211          | 3q13.13         |
| <a href="#">209205_s_at</a>                             | <i>LMO4</i>     | LIM domain only 4                                                                | <b>1.82</b> | 1.48E-04 | 8543           | 1p22.3          |
| <a href="#">214953_s_at</a>                             | <i>APP</i>      | amyloid beta (A4) precursor protein                                              | <b>1.82</b> | 8.81E-04 | 351            | 21q21.2-q21.3   |
| <a href="#">224435_at</a>                               | <i>C10orf58</i> | chromosome 10 open reading frame 58                                              | <b>1.82</b> | 1.00E-07 | 84293          | 10q23.1         |
| <a href="#">209129_at</a>                               | <i>TRIP6</i>    | thyroid hormone receptor interactor 6                                            | <b>1.79</b> | 6.10E-06 | 7205           | 7q22            |

TET2 mutations improve the ELN classification of AML – Data Supplement

|                             |                           |                                                                                                                                                                |             |          |               |                |
|-----------------------------|---------------------------|----------------------------------------------------------------------------------------------------------------------------------------------------------------|-------------|----------|---------------|----------------|
| <a href="#">213931_at</a>   | <b>ID2</b><br><b>ID2B</b> | inhibitor of DNA binding 2, dominant negative helix-loop-helix protein<br>inhibitor of DNA binding 2B, dominant negative helix-loop-helix protein (pseudogene) | <b>1.79</b> | 7.04E-04 | 3398<br>84099 | 2p25<br>3p14.2 |
| <a href="#">228693_at</a>   | <b>CCDC50</b>             | coiled-coil domain containing 50                                                                                                                               | <b>1.79</b> | 5.84E-04 | 152137        | 3q28           |
| <a href="#">235048_at</a>   | <b>FAM169A</b>            | family with sequence similarity 169, member A                                                                                                                  | <b>1.79</b> | 5.02E-05 | 26049         | 5q13.3         |
| <a href="#">243546_at</a>   | ---                       | Transcribed locus Hs.658669                                                                                                                                    | <b>1.79</b> | 6.80E-06 | ---           | ---            |
| <a href="#">218963_s_at</a> | <b>KRT23</b>              | keratin 23 (histone deacetylase inducible)                                                                                                                     | <b>1.75</b> | 3.18E-05 | 25984         | 17q21.2        |
| <a href="#">1559034_at</a>  | <b>SIRPB2</b>             | signal-regulatory protein beta 2                                                                                                                               | <b>1.72</b> | 4.07E-04 | 284759        | 20p13          |
| <a href="#">208782_at</a>   | <b>FSTL1</b>              | folliculin-like 1                                                                                                                                              | <b>1.72</b> | 7.06E-04 | 11167         | 3q13.33        |
| <a href="#">223059_s_at</a> | <b>FAM107B</b>            | family with sequence similarity 107, member B                                                                                                                  | <b>1.72</b> | 9.10E-04 | 83641         | 10p13          |
| <a href="#">226713_at</a>   | <b>CCDC50</b>             | coiled-coil domain containing 50                                                                                                                               | <b>1.72</b> | 6.54E-04 | 152137        | 3q28           |
| <a href="#">206039_at</a>   | <b>RAB33A</b>             | RAB33A, member RAS oncogene family                                                                                                                             | <b>1.69</b> | 2.54E-04 | 9363          | Xq26.1         |
| <a href="#">213397_x_at</a> | <b>RNASE4</b>             | ribonuclease, RNase A family, 4                                                                                                                                | <b>1.69</b> | 1.10E-06 | 6038          | 14q11.1        |
| <a href="#">221024_s_at</a> | <b>SLC2A10</b>            | solute carrier family 2 (facilitated glucose transporter), member 10                                                                                           | <b>1.69</b> | 1.00E-07 | 81031         | 20q13.1        |
| <a href="#">226311_at</a>   | ---                       | ---                                                                                                                                                            | <b>1.69</b> | 5.14E-04 | ---           | ---            |
| <a href="#">213823_at</a>   | <b>HOXA11</b>             | homeobox A11                                                                                                                                                   | <b>1.67</b> | 1.44E-05 | 3207          | 7p15-p14       |
| <a href="#">225123_at</a>   | ---                       | ---                                                                                                                                                            | <b>1.67</b> | 6.02E-04 | ---           | ---            |
| <a href="#">204646_at</a>   | <b>DPYD</b>               | dihydropyrimidine dehydrogenase                                                                                                                                | <b>1.61</b> | 2.48E-04 | 1806          | 1p22           |
| <a href="#">209298_s_at</a> | <b>ITSN1</b>              | intersectin 1 (SH3 domain protein)                                                                                                                             | <b>1.61</b> | 1.30E-06 | 6453          | 21q22.1-q22.2  |
| <a href="#">209610_s_at</a> | <b>SLC1A4</b>             | solute carrier family 1 (glutamate/neutral amino acid transporter), member 4                                                                                   | <b>1.61</b> | 6.13E-05 | 6509          | 2p15-p13       |
| <a href="#">213933_at</a>   | <b>PTGER3</b>             | prostaglandin E receptor 3 (subtype EP3)                                                                                                                       | <b>1.61</b> | 8.64E-05 | 5733          | 1p31.2         |
| <a href="#">219288_at</a>   | <b>C3orf14</b>            | chromosome 3 open reading frame 14                                                                                                                             | <b>1.61</b> | 1.11E-04 | 57415         | 3p14.2         |
| <a href="#">232686_at</a>   | <b>SIGLECP3</b>           | sialic acid binding Ig-like lectin, pseudogene 3                                                                                                               | <b>1.61</b> | 2.53E-04 | 284367        | 19q13.3        |
| <a href="#">235051_at</a>   | <b>CCDC50</b>             | coiled-coil domain containing 50                                                                                                                               | <b>1.61</b> | 9.06E-04 | 152137        | 3q28           |
| <a href="#">1552388_at</a>  | ---                       | hypothetical protein FLJ30901                                                                                                                                  | <b>1.59</b> | 7.96E-04 | 150378        | 22q13.31       |
| <a href="#">203231_s_at</a> | <b>ATXN1</b>              | ataxin 1                                                                                                                                                       | <b>1.59</b> | 9.76E-04 | 6310          | 6p23           |
| <a href="#">203548_s_at</a> | <b>LPL</b>                | lipoprotein lipase                                                                                                                                             | <b>1.59</b> | 2.46E-04 | 4023          | 8p22           |
| <a href="#">213385_at</a>   | <b>CHN2</b>               | chimerin (chimaerin) 2                                                                                                                                         | <b>1.56</b> | 9.44E-04 | 1124          | 7p15.3         |
| <a href="#">219295_s_at</a> | <b>PCOLCE2</b>            | procollagen C-endopeptidase enhancer 2                                                                                                                         | <b>1.56</b> | 2.50E-06 | 26577         | 3q21-q24       |
| <a href="#">226925_at</a>   | <b>ACPL2</b>              | acid phosphatase-like 2                                                                                                                                        | <b>1.56</b> | 4.63E-04 | 92370         | 3q23           |
| <a href="#">200771_at</a>   | <b>LAMC1</b>              | laminin, gamma 1 (formerly LAMB2)                                                                                                                              | <b>1.54</b> | 6.15E-04 | 3915          | 1q31           |



TET2 mutations improve the ELN classification of AML – Data Supplement

|                              |                 |                                                                                                                          |             |          |        |               |
|------------------------------|-----------------|--------------------------------------------------------------------------------------------------------------------------|-------------|----------|--------|---------------|
| <a href="#">207496_at</a>    | <b>MS4A2</b>    | membrane-spanning 4-domains, subfamily A, member 2 (Fc fragment of IgE, high affinity I, receptor for; beta polypeptide) | <b>1.54</b> | 5.99E-04 | 2206   | 11q13         |
| <a href="#">210164_at</a>    | <b>GZMB</b>     | granzyme B (granzyme 2, cytotoxic T-lymphocyte-associated serine esterase 1)                                             | <b>1.54</b> | 8.19E-04 | 3002   | 14q11.2       |
| <a href="#">226609_at</a>    | <b>DCBLD1</b>   | discoidin, CUB and LCCL domain containing 1                                                                              | <b>1.54</b> | 8.18E-04 | 285761 | 6q22.1        |
| <a href="#">228805_at</a>    | <b>C5orf25</b>  | chromosome 5 open reading frame 25                                                                                       | <b>1.54</b> | 2.02E-04 | 375484 | 5q35.2        |
| <a href="#">204039_at</a>    | <b>CEBPA</b>    | CCAAT/enhancer binding protein (C/EBP), alpha                                                                            | <b>1.52</b> | 1.80E-04 | 1050   | 19q13.1       |
| <a href="#">212012_at</a>    | <b>PXDN</b>     | peroxidasin homolog (Drosophila)                                                                                         | <b>1.52</b> | 7.04E-04 | 7837   | 2p25          |
| <a href="#">213915_at</a>    | <b>NKG7</b>     | natural killer cell group 7 sequence                                                                                     | <b>1.52</b> | 3.74E-05 | 4818   | 19q13.41      |
| <a href="#">233518_at</a>    | ---             | Homo sapiens cDNA FLJ11493 fis, clone HEMBA1001940.                                                                      | <b>1.52</b> | 1.51E-04 | ---    | ---           |
| <a href="#">240991_at</a>    | ---             | Transcribed locus                                                                                                        | <b>1.52</b> | 9.05E-04 | ---    | ---           |
| <a href="#">212607_at</a>    | <b>AKT3</b>     | v-akt murine thymoma viral oncogene homolog 3 (protein kinase B, gamma)                                                  | <b>1.49</b> | 6.70E-05 | 10000  | 1q43-q44      |
| <a href="#">212810_s_at</a>  | <b>SLC1A4</b>   | solute carrier family 1 (glutamate/neutral amino acid transporter), member 4                                             | <b>1.49</b> | 5.91E-04 | 6509   | 2p15-p13      |
| <a href="#">239950_at</a>    | <b>HOXA11AS</b> | HOXA11 antisense RNA (non-protein coding)                                                                                | <b>1.49</b> | 8.68E-04 | 221883 | 7p15.2        |
| <a href="#">239934_x_at</a>  | ---             | Transcribed locus Hs.662980                                                                                              | <b>1.47</b> | 3.25E-04 | ---    | ---           |
| <a href="#">207497_s_at</a>  | <b>MS4A2</b>    | membrane-spanning 4-domains, subfamily A, member 2 (Fc fragment of IgE, high affinity I, receptor for; beta polypeptide) | <b>1.45</b> | 3.36E-04 | 2206   | 11q13         |
| <a href="#">210220_at</a>    | <b>FZD2</b>     | frizzled homolog 2 (Drosophila)                                                                                          | <b>1.45</b> | 6.05E-05 | 2535   | 17q21.1       |
| <a href="#">212811_x_at</a>  | <b>SLC1A4</b>   | solute carrier family 1 (glutamate/neutral amino acid transporter), member 4                                             | <b>1.45</b> | 1.74E-04 | 6509   | 2p15-p13      |
| <a href="#">216472_at</a>    | <b>ITSN1</b>    | intersectin 1 (SH3 domain protein)                                                                                       | <b>1.45</b> | 2.50E-04 | 6453   | 21q22.1-q22.2 |
| <a href="#">216628_at</a>    | ---             | cDNA DKFZp586A0617 (from clone DKFZp586A0617)                                                                            | <b>1.45</b> | 1.06E-05 | ---    | ---           |
| <a href="#">219038_at</a>    | <b>MORC4</b>    | MORC family CW-type zinc finger 4                                                                                        | <b>1.45</b> | 3.21E-05 | 79710  | Xq22.3        |
| <a href="#">228600_x_at</a>  | <b>C7orf46</b>  | chromosome 7 open reading frame 46                                                                                       | <b>1.45</b> | 2.60E-04 | 340277 | 7p15.3        |
| <a href="#">238174_at</a>    | ---             | Transcribed locus Hs.112143                                                                                              | <b>1.45</b> | 6.88E-04 | ---    | ---           |
| <a href="#">1553635_s_at</a> | <b>TCTEX1D1</b> | Tctex1 domain containing 1                                                                                               | <b>1.43</b> | 7.32E-04 | 200132 | 1p31.3        |
| <a href="#">202914_s_at</a>  | <b>ARHGEF11</b> | Rho guanine nucleotide exchange factor (GEF) 11                                                                          | <b>1.43</b> | 3.11E-04 | 9826   | 1q21          |
| <a href="#">205308_at</a>    | <b>FAM164A</b>  | family with sequence similarity 164, member A                                                                            | <b>1.43</b> | 3.22E-05 | 51101  | 8q21.12       |
| <a href="#">209297_at</a>    | <b>ITSN1</b>    | intersectin 1 (SH3 domain protein)                                                                                       | <b>1.43</b> | 6.50E-06 | 6453   | 21q22.1-q22.2 |
| <a href="#">213954_at</a>    | <b>FAM169A</b>  | family with sequence similarity 169, member A                                                                            | <b>1.43</b> | 1.21E-04 | 26049  | 5q13.3        |
| <a href="#">223660_at</a>    | <b>ADORA3</b>   | adenosine A3 receptor                                                                                                    | <b>1.43</b> | 9.07E-04 | 140    | 1p13.2        |
| <a href="#">230666_at</a>    | <b>HOXA11AS</b> | HOXA11 antisense RNA (non-protein coding)                                                                                | <b>1.43</b> | 6.87E-04 | 221883 | 7p15.2        |
| <a href="#">232724_at</a>    | <b>MS4A6A</b>   | membrane-spanning 4-domains, subfamily A, member 6A                                                                      | <b>1.43</b> | 5.74E-04 | 64231  | 11q12.1       |

TET2 mutations improve the ELN classification of AML – Data Supplement

|                              |                 |                                                                                                   |             |          |        |               |
|------------------------------|-----------------|---------------------------------------------------------------------------------------------------|-------------|----------|--------|---------------|
| <a href="#">236215_at</a>    | ---             | ---                                                                                               | <b>1.43</b> | 1.10E-06 | ---    | ---           |
| <a href="#">228557_at</a>    | <b>L3MBTL4</b>  | l(3)mbt-like 4 (Drosophila)                                                                       | <b>1.41</b> | 4.23E-04 | 91133  | 18p11.31      |
| <a href="#">233446_at</a>    | <b>ONECUT2</b>  | one cut homeobox 2                                                                                | <b>1.41</b> | 2.75E-04 | 9480   | 18q21.1-q21.2 |
| <a href="#">202913_at</a>    | <b>ARHGEF11</b> | Rho guanine nucleotide exchange factor (GEF) 11                                                   | <b>1.39</b> | 2.14E-04 | 9826   | 1q21          |
| <a href="#">230292_at</a>    | ---             | LOC100131993 similar to hCG2020760                                                                | <b>1.39</b> | 8.12E-04 | 1E+08  | 13q14.2       |
| <a href="#">230446_at</a>    | ---             | Transcribed locus Hs.285724                                                                       | <b>1.39</b> | 5.75E-04 | ---    | ---           |
| <a href="#">239675_at</a>    | ---             | hypothetical protein LOC283143                                                                    | <b>1.39</b> | 3.25E-04 | 283143 | 11q23.3       |
| <a href="#">1557014_a_at</a> | <b>C9orf122</b> | chromosome 9 open reading frame 122                                                               | <b>1.37</b> | 2.60E-05 | 158228 | 9p13.1        |
| <a href="#">205158_at</a>    | <b>RNASE4</b>   | ribonuclease, RNase A family, 4                                                                   | <b>1.37</b> | 1.12E-04 | 6038   | 14q11.1       |
| <a href="#">228218_at</a>    | <b>LAMP</b>     | limbic system-associated membrane protein                                                         | <b>1.37</b> | 4.01E-04 | ---    | ---           |
| <a href="#">228565_at</a>    | <b>KIAA1804</b> | mixed lineage kinase 4                                                                            | <b>1.37</b> | 3.23E-04 | 84451  | 1q42          |
| <a href="#">232309_at</a>    | ---             | hypothetical protein LOC202181                                                                    | <b>1.37</b> | 6.66E-05 | 202181 | 5q35.3        |
| <a href="#">52975_at</a>     | <b>FAM125B</b>  | family with sequence similarity 125, member B                                                     | <b>1.37</b> | 1.17E-04 | 89853  | 9q33.3        |
| <a href="#">1554636_at</a>   | ---             | ENSG00000204636                                                                                   | <b>1.35</b> | 6.35E-04 | ---    | ---           |
| <a href="#">1559500_at</a>   | <b>VPS8</b>     | vacuolar protein sorting 8 homolog (S. cerevisiae)                                                | <b>1.35</b> | 9.73E-04 | 23355  | 3q27.2        |
| <a href="#">218532_s_at</a>  | <b>FAM134B</b>  | family with sequence similarity 134, member B                                                     | <b>1.35</b> | 8.20E-05 | 54463  | 5p15.1        |
| <a href="#">234148_at</a>    | <b>LRRC8D</b>   | Homo sapiens leucine rich repeat containing 8 family, member D                                    | <b>1.35</b> | 7.55E-04 | ---    | ---           |
| <a href="#">241808_at</a>    | <b>FAM164A</b>  | family with sequence similarity 164, member A                                                     | <b>1.35</b> | 1.89E-05 | 51101  | 8q21.12       |
| <a href="#">1560522_at</a>   | ---             | hypothetical protein LOC201477                                                                    | <b>1.33</b> | 7.50E-04 | 201477 | 18p11.31      |
| <a href="#">201349_at</a>    | <b>SLC9A3R1</b> | solute carrier family 9 (sodium/hydrogen exchanger), member 3 regulator 1                         | <b>1.33</b> | 6.41E-04 | 9368   | 17q25.1       |
| <a href="#">203874_s_at</a>  | <b>SMARCA1</b>  | SWI/SNF related, matrix associated, actin dependent regulator of chromatin, subfamily a, member 1 | <b>1.33</b> | 1.92E-05 | 6594   | Xq25          |
| <a href="#">218510_x_at</a>  | <b>FAM134B</b>  | family with sequence similarity 134, member B                                                     | <b>1.33</b> | 5.27E-04 | 54463  | 5p15.1        |
| <a href="#">35776_at</a>     | <b>ITSN1</b>    | intersectin 1 (SH3 domain protein)                                                                | <b>1.33</b> | 1.57E-04 | 6453   | 21q22.1-q22.2 |
| <a href="#">1556602_at</a>   | <b>SLC19A2</b>  | Homo sapiens solute carrier family 19 (thiamine transporter), member 2                            | <b>1.32</b> | 7.75E-04 | 10560  | 1q23.3        |
| <a href="#">200770_s_at</a>  | <b>LAMC1</b>    | laminin, gamma 1 (formerly LAMB2)                                                                 | <b>1.32</b> | 6.68E-04 | 3915   | 1q31          |
| <a href="#">214829_at</a>    | <b>AASS</b>     | aminoadipate-semialdehyde synthase                                                                | <b>1.32</b> | 4.01E-04 | 10157  | 7q31.3        |
| <a href="#">220609_at</a>    | ---             | hypothetical protein LOC202181                                                                    | <b>1.32</b> | 5.96E-05 | 202181 | 5q35.3        |
| <a href="#">221828_s_at</a>  | <b>FAM125B</b>  | family with sequence similarity 125, member B                                                     | <b>1.32</b> | 1.74E-04 | 89853  | 9q33.3        |
| <a href="#">239265_at</a>    | <b>TMEM20</b>   | transmembrane protein 20                                                                          | <b>1.32</b> | 3.78E-04 | 159371 | 10q23.33      |
| <a href="#">240877_x_at</a>  | <b>AMOTL1</b>   | angiomin like 1                                                                                   | <b>1.32</b> | 2.28E-05 | 154810 | 11q14.3       |

TET2 mutations improve the ELN classification of AML – Data Supplement

|                              |                 |                                                                         |             |          |        |                 |
|------------------------------|-----------------|-------------------------------------------------------------------------|-------------|----------|--------|-----------------|
| <a href="#">242045_at</a>    | <b>ANKRD18A</b> | Ankyrin repeat domain 18A                                               | <b>1.32</b> | 3.59E-04 | 253650 | 9p13.1          |
| <a href="#">244752_at</a>    | <b>ZNF438</b>   | zinc finger protein 438                                                 | <b>1.32</b> | 2.99E-04 | 220929 | 10p11.23-p11.22 |
| <a href="#">203143_s_at</a>  | <b>KIAA0040</b> | KIAA0040                                                                | <b>1.30</b> | 4.42E-05 | 9674   | 1q24-q25        |
| <a href="#">204457_s_at</a>  | <b>GAS1</b>     | growth arrest-specific 1                                                | <b>1.30</b> | 6.36E-04 | 2619   | 9q21.3-q22      |
| <a href="#">208493_at</a>    | <b>HOXA11</b>   | homeobox A11                                                            | <b>1.30</b> | 6.44E-04 | 3207   | 7p15-p14        |
| <a href="#">213555_at</a>    | <b>RWDD2A</b>   | RWD domain containing 2A                                                | <b>1.30</b> | 4.20E-04 | 112611 | 6q14.2          |
| <a href="#">239911_at</a>    | <b>ONECUT2</b>  | one cut homeobox 2                                                      | <b>1.30</b> | 5.75E-04 | 9480   | 18q21.1-q21.2   |
| <a href="#">242956_at</a>    | <b>IDH1</b>     | isocitrate dehydrogenase 1 (NADP+), soluble                             | <b>1.30</b> | 2.00E-04 | 3417   | 2q33.3          |
| <a href="#">51158_at</a>     | <b>FAM174B</b>  | family with sequence similarity 174, member B                           | <b>1.30</b> | 4.05E-05 | 400451 | 15q26.1         |
| <a href="#">1552343_s_at</a> | <b>PDE7A</b>    | phosphodiesterase 7A                                                    | <b>1.28</b> | 9.90E-06 | 5150   | 8q13            |
| <a href="#">212552_at</a>    | <b>HPCAL1</b>   | hippocalcin-like 1                                                      | <b>1.28</b> | 4.50E-04 | 3241   | 2p25.1          |
| <a href="#">214255_at</a>    | <b>ATP10A</b>   | ATPase, class V, type 10A                                               | <b>1.28</b> | 5.71E-04 | 57194  | 15q11.2         |
| <a href="#">221880_s_at</a>  | <b>FAM174B</b>  | family with sequence similarity 174, member B                           | <b>1.28</b> | 1.58E-04 | 400451 | 15q26.1         |
| <a href="#">228040_at</a>    | ---             | hypothetical locus MGC21881                                             | <b>1.28</b> | 7.39E-04 | 389741 | 9q21.11         |
| <a href="#">229743_at</a>    | <b>ZNF438</b>   | zinc finger protein 438                                                 | <b>1.28</b> | 5.22E-04 | 220929 | 10p11.23-p11.22 |
| <a href="#">232664_at</a>    | ---             | hypothetical gene FLJ12334 supported by AK022396; AK097927              | <b>1.28</b> | 9.64E-04 | 400946 | 2p24.1          |
| <a href="#">1558685_a_at</a> | ---             | hypothetical protein BC009467                                           | <b>1.27</b> | 1.15E-04 | 158960 | Xq28            |
| <a href="#">207177_at</a>    | <b>PTGFR</b>    | prostaglandin F receptor (FP)                                           | <b>1.27</b> | 3.86E-04 | 5737   | 1p31.1          |
| <a href="#">209204_at</a>    | <b>LMO4</b>     | LIM domain only 4                                                       | <b>1.27</b> | 1.96E-04 | 8543   | 1p22.3          |
| <a href="#">218615_s_at</a>  | <b>TMEM39A</b>  | transmembrane protein 39A                                               | <b>1.27</b> | 6.93E-04 | 55254  | 3q13.33         |
| <a href="#">218796_at</a>    | <b>FERMT1</b>   | fermitin family homolog 1 (Drosophila)                                  | <b>1.27</b> | 9.32E-04 | 55612  | 20p12.3         |
| <a href="#">222880_at</a>    | <b>AKT3</b>     | v-akt murine thymoma viral oncogene homolog 3 (protein kinase B, gamma) | <b>1.27</b> | 7.35E-04 | 10000  | 1q43-q44        |
| <a href="#">226454_at</a>    | <b>MARCH9</b>   | membrane-associated ring finger (C3HC4) 9                               | <b>1.27</b> | 4.12E-04 | 92979  | 12q14.1         |
| <a href="#">1566426_at</a>   | ---             | Transcribed locus Hs.683993                                             | <b>1.25</b> | 8.86E-04 | ---    | ---             |
| <a href="#">215314_at</a>    | <b>ANK3</b>     | ankyrin 3, node of Ranvier (ankyrin G)                                  | <b>1.25</b> | 9.09E-04 | 288    | 10q21.2         |
| <a href="#">226822_at</a>    | <b>STOX2</b>    | storkhead box 2                                                         | <b>1.25</b> | 2.96E-04 | 56977  | 4q35.1          |
| <a href="#">230951_at</a>    | ---             | Transcribed locus Hs.369232                                             | <b>1.25</b> | 9.18E-05 | ---    | ---             |
| <a href="#">201612_at</a>    | <b>ALDH9A1</b>  | aldehyde dehydrogenase 9 family, member A1                              | <b>1.23</b> | 2.48E-04 | 223    | 1q23.1          |
| <a href="#">224229_s_at</a>  | <b>AKT3</b>     | v-akt murine thymoma viral oncogene homolog 3 (protein kinase B, gamma) | <b>1.23</b> | 5.18E-04 | 10000  | 1q43-q44        |
| <a href="#">200831_s_at</a>  | <b>SCD</b>      | stearoyl-CoA desaturase (delta-9-desaturase)                            | <b>1.22</b> | 9.24E-05 | 6319   | 10q24.31        |

TET2 mutations improve the ELN classification of AML – Data Supplement

|                              |                |                                                                        |             |          |        |              |
|------------------------------|----------------|------------------------------------------------------------------------|-------------|----------|--------|--------------|
| <a href="#">225459_at</a>    | <b>AMOTL1</b>  | angiomin like 1                                                        | <b>1.22</b> | 9.84E-04 | 154810 | 11q14.3      |
| <a href="#">241723_at</a>    | <b>IQGAP2</b>  | IQ motif containing GTPase activating protein 2                        | <b>1.22</b> | 9.27E-04 | 10788  | 5q13.3       |
| <a href="#">1552788_a_at</a> | <b>HELB</b>    | helicase (DNA) B                                                       | <b>1.20</b> | 3.39E-04 | 92797  | 12q14.3      |
| <a href="#">1554701_a_at</a> | <b>TBC1D16</b> | TBC1 domain family, member 16                                          | <b>1.20</b> | 2.60E-05 | 125058 | 17q25.3      |
| <a href="#">231532_at</a>    | <b>NCAM1</b>   | neural cell adhesion molecule 1                                        | <b>1.19</b> | 5.29E-04 | 4684   | 11q23.1      |
| <a href="#">242879_x_at</a>  | ---            | ---                                                                    | <b>1.19</b> | 6.60E-04 | ---    | ---          |
| <a href="#">204944_at</a>    | <b>PTPRG</b>   | protein tyrosine phosphatase, receptor type, G                         | <b>1.18</b> | 5.70E-05 | 5793   | 3p21-p14     |
| <a href="#">227803_at</a>    | <b>ENPP5</b>   | ectonucleotide pyrophosphatase/phosphodiesterase 5 (putative function) | <b>1.14</b> | 5.08E-04 | 59084  | 6p21.1-p11.2 |

**Probe-sets downregulated in TET2-mutated patients**

| <b>Affymetrix Probe-Set</b>  | <b>Gene Symbol</b> | <b>Description</b>                                                             | <b>Fold Change</b> | <b>P</b> | <b>Entrez Gene ID</b> | <b>Chromosome Band</b> |
|------------------------------|--------------------|--------------------------------------------------------------------------------|--------------------|----------|-----------------------|------------------------|
| <a href="#">219876_s_at</a>  | <b>GOLGA2L1</b>    | golgi autoantigen, golgin subfamily a, 2-like 1                                | <b>0.85</b>        | 9.85E-04 | 55592                 | 12q23.1                |
| <a href="#">222432_s_at</a>  | <b>CCDC47</b>      | coiled-coil domain containing 47                                               | <b>0.83</b>        | 6.73E-04 | 57003                 | 17q23.3                |
| <a href="#">208066_s_at</a>  | <b>GTF2B</b>       | general transcription factor IIB                                               | <b>0.83</b>        | 3.97E-04 | 2959                  | 1p22-p21               |
| <a href="#">217836_s_at</a>  | <b>YY1AP1</b>      | YY1 associated protein 1                                                       | <b>0.83</b>        | 5.11E-04 | 55249                 | 1q22                   |
| <a href="#">210687_at</a>    | <b>CPT1A</b>       | carnitine palmitoyltransferase 1A (liver)                                      | <b>0.82</b>        | 9.25E-04 | 1374                  | 11q13.1-q13.2          |
| <a href="#">203598_s_at</a>  | <b>WBP4</b>        | WW domain binding protein 4 (formin binding protein 21)                        | <b>0.81</b>        | 7.11E-04 | 11193                 | 13q14.11               |
| <a href="#">225222_at</a>    | <b>HIAT1</b>       | hippocampus abundant transcript 1                                              | <b>0.81</b>        | 1.87E-04 | 64645                 | 1p21.2                 |
| <a href="#">235269_at</a>    | <b>FAM83F</b>      | family with sequence similarity 83, member F                                   | <b>0.81</b>        | 3.26E-05 | 113828                | 22q13.1                |
| <a href="#">238035_at</a>    | <b>SP3</b>         | Sp3 transcription factor                                                       | <b>0.81</b>        | 7.18E-04 | 6670                  | 2q31                   |
| <a href="#">1554229_at</a>   | <b>C5orf41</b>     | chromosome 5 open reading frame 41                                             | <b>0.80</b>        | 6.60E-04 | 153222                | 5q35.1                 |
| <a href="#">206003_at</a>    | <b>CEP135</b>      | centrosomal protein 135kDa                                                     | <b>0.80</b>        | 3.09E-04 | 9662                  | 4q12                   |
| <a href="#">209861_s_at</a>  | <b>METAP2</b>      | methionyl aminopeptidase 2                                                     | <b>0.80</b>        | 8.06E-04 | 10988                 | 12q22                  |
| <a href="#">213546_at</a>    | ---                | hypothetical protein DKFZp586l1420                                             | <b>0.80</b>        | 1.54E-04 | 222161                | 7p14.3                 |
| <a href="#">223085_at</a>    | <b>RNF19A</b>      | ring finger protein 19A                                                        | <b>0.80</b>        | 1.15E-04 | 25897                 | 8q22                   |
| <a href="#">208844_at</a>    | <b>VDAC3</b>       | voltage-dependent anion channel 3                                              | <b>0.79</b>        | 5.51E-04 | 7419                  | 8p11.2                 |
| <a href="#">233191_at</a>    | <b>RUFY2</b>       | RUN and FYVE domain containing 2                                               | <b>0.79</b>        | 1.24E-04 | 55680                 | 10q21.3                |
| <a href="#">1556224_a_at</a> | <b>ZNF783</b>      | zinc finger family member 783                                                  | <b>0.79</b>        | 8.93E-04 | 155060                | 7q36.1                 |
| <a href="#">203579_s_at</a>  | <b>SLC7A6</b>      | solute carrier family 7 (cationic amino acid transporter, y+ system), member 6 | <b>0.79</b>        | 1.87E-04 | 9057                  | 16q22.1                |
| <a href="#">221781_s_at</a>  | <b>DNAJC10</b>     | DnaJ (Hsp40) homolog, subfamily C, member 10                                   | <b>0.79</b>        | 7.46E-04 | 54431                 | 2q32.1                 |
| <a href="#">229791_at</a>    | <b>LPCAT2</b>      | lysophosphatidylcholine acyltransferase 2                                      | <b>0.79</b>        | 6.02E-04 | 54947                 | 16q12.2                |

TET2 mutations improve the ELN classification of AML – Data Supplement

|                              |               |                                                                                |             |          |        |               |
|------------------------------|---------------|--------------------------------------------------------------------------------|-------------|----------|--------|---------------|
| <a href="#">239973_at</a>    | ---           | Transcribed locus Hs.212709                                                    | <b>0.79</b> | 2.61E-04 | ---    | ---           |
| <a href="#">220018_at</a>    | <b>CBLL1</b>  | Cas-Br-M (murine) ecotropic retroviral transforming sequence-like 1            | <b>0.78</b> | 7.74E-04 | 79872  | 7q22.3-q31.1  |
| <a href="#">1554057_at</a>   | ---           | hypothetical LOC645676                                                         | <b>0.77</b> | 4.11E-04 | 645676 | 1q22          |
| <a href="#">1558914_at</a>   | <b>PPPDE1</b> | PPPDE peptidase domain containing 1                                            | <b>0.77</b> | 8.38E-05 | 51029  | 1q44          |
| <a href="#">203578_s_at</a>  | <b>SLC7A6</b> | solute carrier family 7 (cationic amino acid transporter, y+ system), member 6 | <b>0.77</b> | 2.11E-04 | 9057   | 16q22.1       |
| <a href="#">223925_s_at</a>  | <b>LUZP6</b>  | leucine zipper protein 6                                                       | <b>0.77</b> | 6.51E-04 | 136319 | 7q33          |
| <a href="#">202693_s_at</a>  | <b>STK17A</b> | serine/threonine kinase 17a                                                    | <b>0.76</b> | 4.93E-04 | 9263   | 7p12-p14      |
| <a href="#">212597_s_at</a>  | <b>HMGXB4</b> | HMG box domain containing 4                                                    | <b>0.76</b> | 3.31E-04 | 10042  | 22q13.1       |
| <a href="#">237626_at</a>    | ---           | Transcribed locus Hs.671926                                                    | <b>0.76</b> | 1.29E-04 | ---    | ---           |
| <a href="#">244561_at</a>    | ---           | Homo sapiens cDNA clone IMAGE:3079901                                          | <b>0.76</b> | 2.80E-04 | ---    | ---           |
| <a href="#">1568665_at</a>   | <b>RNF103</b> | ring finger protein 103                                                        | <b>0.75</b> | 1.30E-04 | 7844   | 2p11.2        |
| <a href="#">202427_s_at</a>  | <b>BRP44</b>  | brain protein 44                                                               | <b>0.75</b> | 8.05E-05 | 25874  | 1q24          |
| <a href="#">217845_x_at</a>  | <b>HIGD1A</b> | HIG1 hypoxia inducible domain family, member 1A                                | <b>0.75</b> | 8.05E-05 | 25994  | 3p22.1        |
| <a href="#">219201_s_at</a>  | <b>TWSG1</b>  | twisted gastrulation homolog 1 (Drosophila)                                    | <b>0.75</b> | 9.62E-04 | 57045  | 18p11.3       |
| <a href="#">227718_at</a>    | <b>PURB</b>   | purine-rich element binding protein B                                          | <b>0.75</b> | 2.11E-04 | 5814   | 7p13          |
| <a href="#">64488_at</a>     | <b>IRGQ</b>   | immunity-related GTPase family, Q                                              | <b>0.75</b> | 3.71E-04 | 126298 | 19q13.31      |
| <a href="#">205288_at</a>    | <b>CDC14A</b> | CDC14 cell division cycle 14 homolog A (S. cerevisiae)                         | <b>0.75</b> | 2.12E-04 | 8556   | 1p21          |
| <a href="#">221595_at</a>    | ---           | ---                                                                            | <b>0.75</b> | 3.64E-05 | ---    | ---           |
| <a href="#">204761_at</a>    | <b>USP6NL</b> | USP6 N-terminal like                                                           | <b>0.74</b> | 2.10E-06 | 9712   | 10p13         |
| <a href="#">210150_s_at</a>  | <b>LAMA5</b>  | laminin, alpha 5                                                               | <b>0.74</b> | 5.12E-04 | 3911   | 20q13.2-q13.3 |
| <a href="#">221896_s_at</a>  | <b>HIGD1A</b> | HIG1 hypoxia inducible domain family, member 1A                                | <b>0.74</b> | 4.71E-05 | 25994  | 3p22.1        |
| <a href="#">227669_at</a>    | <b>BRP44</b>  | brain protein 44                                                               | <b>0.73</b> | 6.33E-05 | 25874  | 1q24          |
| <a href="#">37408_at</a>     | <b>MRC2</b>   | mannose receptor, C type 2                                                     | <b>0.72</b> | 6.78E-05 | 9902   | 17q23.2       |
| <a href="#">1557030_at</a>   | <b>GAB1</b>   | GRB2-associated binding protein 1                                              | <b>0.71</b> | 7.31E-04 | 2549   | 4q31.21       |
| <a href="#">238164_at</a>    | <b>USP6NL</b> | USP6 N-terminal like                                                           | <b>0.71</b> | 4.57E-04 | 9712   | 10p13         |
| <a href="#">1569025_s_at</a> | <b>FAM13A</b> | family with sequence similarity 13, member A                                   | <b>0.69</b> | 4.52E-04 | 10144  | 4q22.1        |
| <a href="#">203593_at</a>    | <b>CD2AP</b>  | CD2-associated protein                                                         | <b>0.69</b> | 1.74E-04 | 23607  | 6p12          |
| <a href="#">226278_at</a>    | <b>SVIP</b>   | small VCP/p97-interacting protein                                              | <b>0.68</b> | 1.13E-05 | 258010 | 11p14.2       |
| <a href="#">228442_at</a>    | ---           | Transcribed locus Hs.599855                                                    | <b>0.68</b> | 6.04E-04 | ---    | Xp            |
| <a href="#">228654_at</a>    | <b>SPIN4</b>  | spindlin family, member 4                                                      | <b>0.68</b> | 1.49E-04 | 139886 | Xq11.1        |
| <a href="#">230285_at</a>    | <b>SVIP</b>   | small VCP/p97-interacting protein                                              | <b>0.67</b> | 4.86E-04 | 258010 | 11p14.2       |

TET2 mutations improve the ELN classification of AML – Data Supplement

|                              |                                                                                                    |                                                                                                                                                                                                                                                                                  |             |          |                                                             |          |
|------------------------------|----------------------------------------------------------------------------------------------------|----------------------------------------------------------------------------------------------------------------------------------------------------------------------------------------------------------------------------------------------------------------------------------|-------------|----------|-------------------------------------------------------------|----------|
| <a href="#">230006_s_at</a>  | <b>SVIP</b>                                                                                        | small VCP/p97-interacting protein                                                                                                                                                                                                                                                | <b>0.66</b> | 7.40E-06 | 258010                                                      | 11p14.2  |
| <a href="#">244110_at</a>    | <b>MLL</b>                                                                                         | Myeloid/lymphoid or mixed-lineage leukemia (trithorax homolog, Drosophila)                                                                                                                                                                                                       | <b>0.65</b> | 2.51E-04 | 4297                                                        | 11q23    |
| <a href="#">1554918_a_at</a> | <b>ABCC4</b>                                                                                       | ATP-binding cassette, sub-family C (CFTR/MRP), member 4                                                                                                                                                                                                                          | <b>0.65</b> | 3.93E-04 | 10257                                                       | 13q32    |
| <a href="#">203196_at</a>    | <b>ABCC4</b>                                                                                       | ATP-binding cassette, sub-family C (CFTR/MRP), member 4                                                                                                                                                                                                                          | <b>0.64</b> | 5.36E-04 | 10257                                                       | 13q32    |
| <a href="#">1559266_s_at</a> | <b>C10orf140</b>                                                                                   | chromosome 10 open reading frame 140                                                                                                                                                                                                                                             | <b>0.62</b> | 9.35E-04 | 387640                                                      | 10p12.31 |
| <a href="#">203680_at</a>    | <b>PRKAR2B</b>                                                                                     | protein kinase, cAMP-dependent, regulatory, type II, beta                                                                                                                                                                                                                        | <b>0.51</b> | 2.71E-04 | 5577                                                        | 7q22     |
| <a href="#">213515_x_at</a>  | <b>HBG1</b><br><b>HBG2</b>                                                                         | hemoglobin, gamma A<br>hemoglobin, gamma G                                                                                                                                                                                                                                       | <b>0.36</b> | 2.00E-04 | 3047<br>3048                                                | 11p15.5  |
| <a href="#">204848_x_at</a>  | <b>HBG1</b><br><b>HBG2</b>                                                                         | hemoglobin, gamma A<br>hemoglobin, gamma G                                                                                                                                                                                                                                       | <b>0.33</b> | 1.29E-04 | 3047<br>3048                                                | 11p15.5  |
| <a href="#">206310_at</a>    | <b>SPINK2</b>                                                                                      | serine peptidase inhibitor, Kazal type 2 (acrosin-trypsin inhibitor)                                                                                                                                                                                                             | <b>0.33</b> | 1.41E-05 | 6691                                                        | 4q12     |
| <a href="#">204419_x_at</a>  | <b>HBG1</b><br><b>HBG2</b>                                                                         | hemoglobin, gamma A<br>hemoglobin, gamma G                                                                                                                                                                                                                                       | <b>0.31</b> | 9.59E-05 | 3047<br>3048                                                | 11p15.5  |
| <a href="#">235700_at</a>    | <b>CT45A1</b><br><b>CT45A2</b><br><b>CT45A3</b><br><b>CT45A4</b><br><b>CT45A5</b><br><b>CT45A6</b> | cancer/testis antigen family 45, member A1<br>cancer/testis antigen family 45, member A2<br>cancer/testis antigen family 45, member A3<br>cancer/testis antigen family 45, member A4<br>cancer/testis antigen family 45, member A5<br>cancer/testis antigen family 45, member A6 | <b>0.28</b> | 3.93E-04 | 100133581<br>441519<br>441520<br>441521<br>541465<br>541466 | Xq26.3   |
| <a href="#">1567912_s_at</a> | <b>CT45A1</b><br><b>CT45A2</b><br><b>CT45A3</b><br><b>CT45A4</b><br><b>CT45A5</b><br><b>CT45A6</b> | cancer/testis antigen family 45, member A1<br>cancer/testis antigen family 45, member A2<br>cancer/testis antigen family 45, member A3<br>cancer/testis antigen family 45, member A4<br>cancer/testis antigen family 45, member A5<br>cancer/testis antigen family 45, member A6 | <b>0.25</b> | 2.66E-04 | 100133581<br>441519<br>441520<br>441521<br>541465<br>541466 | Xq26.3   |

ABBREVIATION: ELN, European LeukemiaNet.

NOTE: Fold change indicates the ratio of average expression values of TET2-mutated to TET2-wild-type patients.

**Table A4.** List of microRNA Probes Differentially Expressed Between *TET2*-Mutated and *TET2*-Wild-Type Cytogenetically Normal Acute Myeloid Leukemia Classified in the ELN Favorable-Risk Category

| <b>Probes upregulated in <i>TET2</i>-mutated patients</b>   |                                           |                    |          |
|-------------------------------------------------------------|-------------------------------------------|--------------------|----------|
| <b>Target microRNA</b>                                      | <b>Probe Sequence</b>                     | <b>Fold Change</b> | <b>P</b> |
| hsa-miR-148a                                                | TGAGTATGATAGAAGTCAGTGCACCTACAGAACTTTGTCTC | 2.04               | 0.00074  |
| hsa-miR-148b                                                | TCTGAAAGTCAGTGCATCACAGAACTTTGTCTCGAAAGCT  | 1.61               | 0.00229  |
| hsa-miR-24                                                  | TTTTACACACTGGCTCAGTTCAGCAGGAACAGGAGTCGAG  | 1.45               | 0.00428  |
| hsa-mir-640 (prec)                                          | GTGACCCTGGGCAAGTTCCTGAAGATCAGACACATCAGAT  | 1.35               | 0.00236  |
| hsa-miR-24                                                  | AGTTGGTTTGTGTACACTGGCTCAGTTCAGCAGGAACAGG  | 1.35               | 0.00328  |
| hsa-miR-107                                                 | GGCATGGAGTTCAAGCAGCATTGTACAGGGCTATCAAAGC  | 1.33               | 0.00462  |
| <b>Probes down-egulated in <i>TET2</i>-mutated patients</b> |                                           |                    |          |
| <b>Target microRNA</b>                                      | <b>Probe Sequence</b>                     | <b>Fold Change</b> | <b>P</b> |
| hsa-miR-135a                                                | AATTCACCTCTAGTGCTTTATGGCTTTTTATTCCTATGTGA | 0.65               | 0.00028  |
| hsa-miR-186                                                 | CTTGTAACCTTCCAAAGAATTCTCCTTTTGGGCTTTCTGG  | 0.41               | 0.00161  |

ABBREVIATION: ELN, European LeukemiaNet.

NOTE: Fold change indicates the ratio of average expression values of *TET2*-mutated to *TET2*-wild-type patients. MicroRNA expression profiles were available only for older patients (≥60 years).

**Table A5.** List of microRNA Probes Differentially Expressed Between *TET2*-Mutated and *TET2*-Wild-Type Cytogenetically Normal Acute Myeloid Leukemia Classified in the ELN Intermediate-I-Risk Category

| Probes upregulated in <i>TET2</i> -mutated patients   |                                           |             |         |
|-------------------------------------------------------|-------------------------------------------|-------------|---------|
| Target microRNA                                       | Probe Sequence                            | Fold Change | P       |
| hsa-miR-331-5p                                        | GAGTTTGGTTTTGTTTGGGTTTGTCTAGGTATGGTCCCA   | 1.47        | 0.00271 |
| hsa-mir-660 (prec)                                    | TGTGTGCATGGATTACAGGAGGGTGAGCCTTGTCATCGTG  | 1.43        | 0.00046 |
| hsa-mir-539 (prec)                                    | ATTTATGATGAATCATAACAAGGACAATTTCTTTTTGAGTA | 1.39        | 0.00132 |
| hsa-miR-498                                           | AGCTCAGGCTGTGATTTCAAGCCAGGGGGCGTTTTTCTAT  | 1.35        | 0.00407 |
| hsa-mir-204 (prec)                                    | AGGCTGGGAAGGCAAAGGGACGTTCAATTGTCATCACTGG  | 1.32        | 0.00133 |
| hsa-miR-373*                                          | GGGATACTCAAAATGGGGGCGCTTTCCTTTTTGTCTGTAC  | 1.30        | 0.00249 |
| Probes downregulated in <i>TET2</i> -mutated patients |                                           |             |         |
| Target microRNA                                       | Probe Sequence                            | Fold Change | P       |
| hsa-miR-374a                                          | ACATCGGCCATTATAATACAACCTGATAAGTGTTATAGCA  | 0.69        | 0.00426 |
| hsa-miR-152                                           | ACTCGGGCTCTGGAGCAGTCAGTGCATGACAGAACTTGGG  | 0.68        | 0.00280 |
| hsa-miR-126*                                          | GCTGGCGACGGGACATTATTACTTTTGGTACGCGCTGTGA  | 0.66        | 0.00120 |
| hsa-miR-19b                                           | TTCTGCTGTGCAAAATCCATGCAAAACTGACTGTGGTAGTG | 0.65        | 0.00177 |
| hsa-miR-590-5p                                        | TAGCCAGTCAGAAATGAGCTTATTCATAAAAAGTGCAGTAT | 0.63        | 0.00308 |
| hsa-miR-454                                           | GTTCTGAGTAGTGCAATATTGCTTATAGGGTTTTGGTGTT  | 0.61        | 0.00042 |
| hsa-miR-126                                           | TGTGACACTTCAAACCTCGTACCGTGAGTAATAATGCGCCG | 0.53        | 0.00218 |
| hsa-miR-126                                           | ACACTTCAAACCTCGTACCGTGAGTAATAATGCGCCGTCCA | 0.48        | 0.00031 |
| hsa-miR-126                                           | ACACTTCAAACCTCGTACCGTGAGTAATAATGCGCCGTCCA | 0.47        | 0.00035 |

ABBREVIATION: ELN, European LeukemiaNet.

NOTE: Fold change indicates the ratio of average expression values of *TET2*-mutated to *TET2*-wild-type patients. MicroRNA expression profiles were available only for older patients (≥60 years).



**Table A6:** Treatment Outcomes According to *TET2* Mutation Status in Subgroups within the ELN Favorable-Risk Category

|                                           | <b>Molecular subgroup</b>                                    | <b>Endpoint</b>                      | <b><i>TET2</i> Mutated</b> | <b><i>TET2</i> Wild-Type</b> | <b><i>P</i></b> |      |
|-------------------------------------------|--------------------------------------------------------------|--------------------------------------|----------------------------|------------------------------|-----------------|------|
| <b>ELN favorable-risk group<br/>n=199</b> | <b>Mutated <i>NPM1</i> without <i>FLT3</i>-ITD<br/>n=142</b> |                                      | <b>n=34</b>                | <b>n=108</b>                 |                 |      |
|                                           |                                                              | Event-free survival                  |                            |                              | .003            |      |
|                                           |                                                              | Median, years                        | 0.8                        | 1.8                          |                 |      |
|                                           |                                                              | % event-free at 3 years (95% CI)     | 21 (19-35)                 | 42 (32-51)                   |                 |      |
|                                           |                                                              | Complete remission, no. (%)          | 25 (74)                    | 99 (90)                      | .02             |      |
|                                           |                                                              | Disease-free survival                |                            |                              | .046            |      |
|                                           |                                                              | Median, years                        | 1.2                        | 2.1                          |                 |      |
|                                           |                                                              | % disease-free at 3 years (95% CI)   | 24 (10-42)                 | 46 (36-55)                   |                 |      |
|                                           |                                                              | Overall survival                     |                            |                              | .07             |      |
|                                           | Median, years                                                | 1.7                                  | 3.8                        |                              |                 |      |
|                                           | % alive at 3 years (95% CI)                                  | 35 (19-51)                           | 54 (44-63)                 |                              |                 |      |
|                                           |                                                              | <b>Mutated <i>CEBPA</i><br/>n=62</b> |                            | <b>n=20</b>                  | <b>n=42</b>     |      |
|                                           |                                                              | Event-free survival                  |                            |                              |                 | .009 |
|                                           |                                                              | Median, years                        | 0.5                        | 2.2                          |                 |      |
|                                           |                                                              | % event-free at 3 years (95% CI)     | 20 (6-39)                  | 45 (30-59)                   |                 |      |
|                                           | Complete remission, no. (%)                                  | 15 (75)                              | 37 (88)                    | .27                          |                 |      |
|                                           | Disease-free survival                                        |                                      |                            |                              | .03             |      |
|                                           | Median, years                                                | 0.8                                  | 4.1                        |                              |                 |      |
|                                           | % disease-free at 3 years (95% CI)                           | 27 (8-50)                            | 51 (34-66)                 |                              |                 |      |
|                                           | Overall survival                                             |                                      |                            |                              | .003            |      |
|                                           | Median, years                                                | 1.2                                  | 3.6                        |                              |                 |      |
|                                           | % alive at 3 years (95% CI)                                  | 25 (9-45)                            | 55 (39-68)                 |                              |                 |      |

ABBREVIATIONS: CI, confidence interval; ELN, European LeukemiaNet.

**Table A7:** Treatment Outcomes According to *TET2* Mutation Status in Subgroups within the ELN Intermediate-I-Risk Category

|                                        | Molecular Subgroup                                                              | Endpoint                                                                             | <i>TET2</i> Mutated              | <i>TET2</i> Wild-Type | <i>P</i> |     |
|----------------------------------------|---------------------------------------------------------------------------------|--------------------------------------------------------------------------------------|----------------------------------|-----------------------|----------|-----|
| ELN intermediate-I-risk group<br>n=219 | <b>Mutated <i>NPM1</i> and <i>FLT3</i>-ITD; wild-type <i>CEBPA</i></b><br>n=103 |                                                                                      | <b>n=24</b>                      | <b>n=79</b>           |          |     |
|                                        |                                                                                 | Event-free survival                                                                  |                                  |                       | .66      |     |
|                                        |                                                                                 | Median, years                                                                        | 0.5                              | 0.6                   |          |     |
|                                        |                                                                                 | % event-free at 3 years (95% CI)                                                     | 25 (10-43)                       | 13 (6-21)             |          |     |
|                                        |                                                                                 | Complete remission, no. (%)                                                          | 19 (79)                          | 60 (76)               | 1.0      |     |
|                                        |                                                                                 | Disease-free survival                                                                |                                  |                       | .67      |     |
|                                        |                                                                                 | Median, years                                                                        | 0.5                              | 0.6                   |          |     |
|                                        |                                                                                 | % disease-free at 3 years (95% CI)                                                   | 32 (13-52)                       | 17 (9-27)             |          |     |
|                                        |                                                                                 | Overall survival                                                                     |                                  |                       | .90      |     |
|                                        | Median, years                                                                   | 0.8                                                                                  | 0.8                              |                       |          |     |
|                                        | % alive at 3 years (95% CI)                                                     | 29 (13-48)                                                                           | 24 (15-34)                       |                       |          |     |
|                                        |                                                                                 |                                                                                      | <b>n=6</b>                       | <b>n=18</b>           |          |     |
|                                        |                                                                                 | <b>Wild-type <i>NPM1</i> and <i>FLT3</i>-ITD; wild-type <i>CEBPA</i></b><br>n=24     | Event-free survival*             |                       |          | --- |
|                                        |                                                                                 |                                                                                      | Median, years                    | 0.4                   | 0.2      |     |
|                                        |                                                                                 |                                                                                      | % event-free at 3 years (95% CI) | 17 (1-52)             | 0        |     |
|                                        |                                                                                 |                                                                                      | Complete remission, n (%)        | 3 (50)                | 7 (39)   | .67 |
|                                        |                                                                                 |                                                                                      | Disease-free survival†           | ---                   | ---      | --- |
|                                        |                                                                                 |                                                                                      | Overall survival*                |                       |          | --- |
|                                        |                                                                                 | Median, years                                                                        | 0.7                              | 0.8                   |          |     |
|                                        |                                                                                 | % alive at 3 years (95% CI)                                                          | 17 (1-52)                        | 0                     |          |     |
|                                        |                                                                                 | <b>Wild-type <i>NPM1</i> without <i>FLT3</i>-ITD; wild-type <i>CEBPA</i></b><br>n=92 | <b>n=12</b>                      | <b>n=80</b>           |          |     |
|                                        |                                                                                 | Event-free survival                                                                  |                                  |                       | .40      |     |
|                                        |                                                                                 | Median, years                                                                        | 0.3                              | 0.6                   |          |     |
|                                        |                                                                                 | % event-free at 3 years (95% CI)                                                     | 0                                | 8 (3-15)              |          |     |
|                                        |                                                                                 | Complete remission, no. (%)                                                          | 6 (50)                           | 48 (60)               | .54      |     |
|                                        |                                                                                 | Disease-free survival*                                                               |                                  |                       | ---      |     |
|                                        |                                                                                 | Median, years                                                                        | 0.8                              | 1.0                   |          |     |
|                                        |                                                                                 | % disease-free at 3 years (95% CI)                                                   | 0                                | 13 (5-23)             |          |     |
|                                        |                                                                                 | Overall survival                                                                     |                                  |                       | .79      |     |
|                                        |                                                                                 | Median, years                                                                        | 1.4                              | 1.2                   |          |     |
|                                        |                                                                                 | % alive at 3 years (95% CI)                                                          | 8 (1-31)                         | 19 (11-28)            |          |     |

**ABBREVIATIONS:** CI, confidence interval; ELN, European LeukemiaNet.

\*Insufficient number of events for statistical comparison.

†To few patients to provide median or 3-year disease-free survival.

## Figure Legends

**Figure A1.** Frequency of *TET2* mutations across decades of age in 418 patients with primary cytogenetically normal acute myeloid leukemia. The heights of the bars represent the prevalence of *TET2* mutations in patients aged 18–29 years, 30–39 years, 40–49 years, 50–59 years, 60–69 years, and 70 years or older. The *P*-value for trend, analyzing *TET2* mutation frequency across age groups, was calculated by the Armitage trend test.

**Figure A2.** Heat map of the gene-expression signature associated with *TET2* mutations in patients with ELN favorable-risk, primary cytogenetically normal acute myeloid leukemia. Rows represent probe-sets, and columns represent individual patients. Patients are grouped by *TET2* mutation status and genes are ordered by hierarchical cluster analysis. Expression values of the probe-sets are represented by color, with green indicating expression less than, and red indicating expression greater than, the median value for the given probe-set. One-hundred-fifty probe-sets were upregulated and 63 probe-sets were downregulated in patients with *TET2* mutations, as compared with *TET2* wild-type patients. Arrows identify genes that are discussed in the text, with vertical bars indicating multiple probe-sets representing the same gene.

**Figure A3.** Heat maps of the microRNA-expression signatures associated with *TET2* mutations in (A) ELN favorable-risk and (B) ELN intermediate-I-risk patients  $\geq 60$  years with primary cytogenetically normal acute myeloid leukemia. Rows represent microRNA probes, and columns represent individual patients. Patients are grouped by *TET2*

mutation status and microRNAs are ordered by hierarchical cluster analysis. *miR-24* is listed twice, and *miR-126* is listed three times, because they are represented by two or three distinct probes in the signature, respectively. Expression values of the probes are represented by color, with green indicating expression less than, and red indicating expression greater than, the median value for the given probe. Among favorable-risk patients, 6 microRNA probes were significantly upregulated and 2 were downregulated in *TET2*-mutated versus *TET2*-wild-type patients. In the intermediate-I-risk group, 6 probes were upregulated in *TET2*-mutated versus *TET2*-wild-type patients, and 9 were downregulated. There was no overlap between the microRNA probes contained in these two signatures. Arrows highlight microRNAs that are discussed in the text.

**Figure A4.** Outcomes according to the European LeukemiaNet (ELN) risk classification in our cohort of cytogenetically normal acute myeloid leukemia (CN-AML) patients. (A) Disease-free survival and (B) overall survival of CN-AML patients in the ELN favorable- and intermediate-I-risk categories. The favorable-risk group is defined as patients with mutated *CEBPA* and/or mutated *NPM1* without *FLT3*-ITD. All remaining CN-AML patients belong to the intermediate-I-risk category.

**Figure A5.** Association of *TET2* mutations with survival in molecular subsets of ELN favorable-risk cytogenetically normal acute myeloid leukemia. (A) Disease-free survival and (B) overall survival according to *TET2* mutation status, in patients with mutated *NPM1* without *FLT3*-ITD. (C) Disease-free survival and (D) overall survival according to

*TET2* mutation status in patients with mutated *CEBPA*. Abbreviations: mut, mutated; wt, wild-type.

**Figure A6.** Association of *TET2* mutations with survival in molecular subsets of ELN intermediate-I-risk cytogenetically normal acute myeloid leukemia. (A) Overall survival according to *TET2* mutation status, in patients with mutated *NPM1* and *FLT3*-ITD and wild-type *CEBPA*. (B) Overall survival according to *TET2* mutation status in patients with wild-type *NPM1* without *FLT3*-ITD, and wild-type *CEBPA*. (C) Overall survival according to *TET2* mutation status in patients with wild-type *NPM1* and *FLT3*-ITD, and wild-type *CEBPA*. Abbreviations: mut, mutated; wt, wild-type.

Figure A1

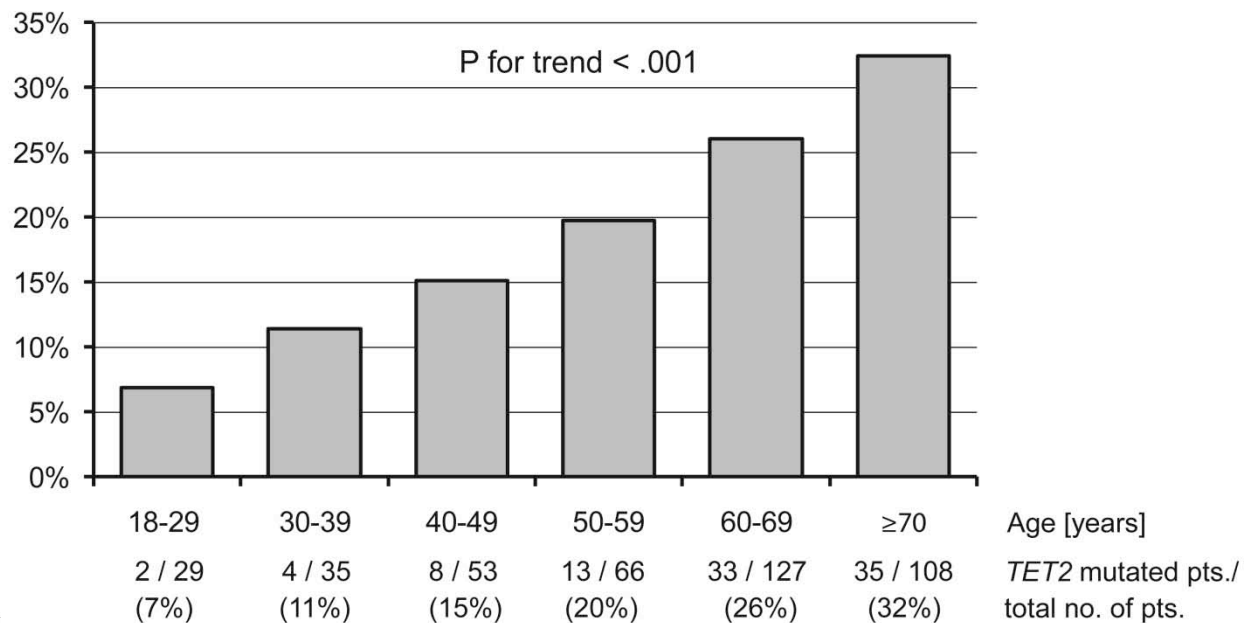

Figure A2

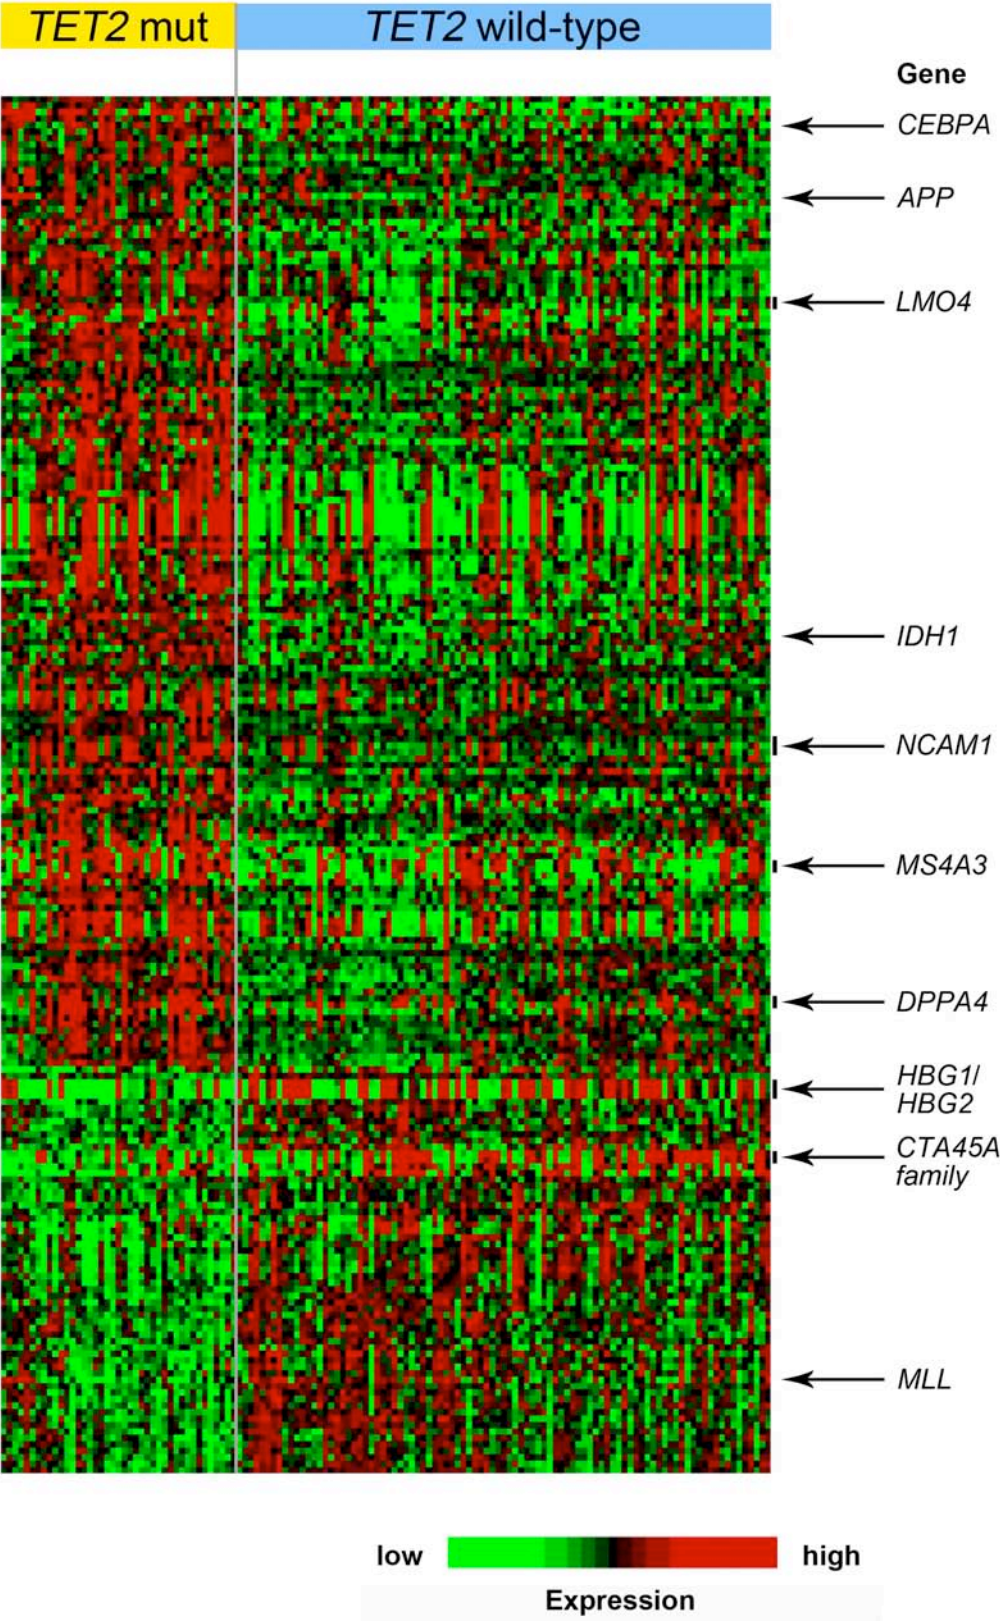

Figure A3

A

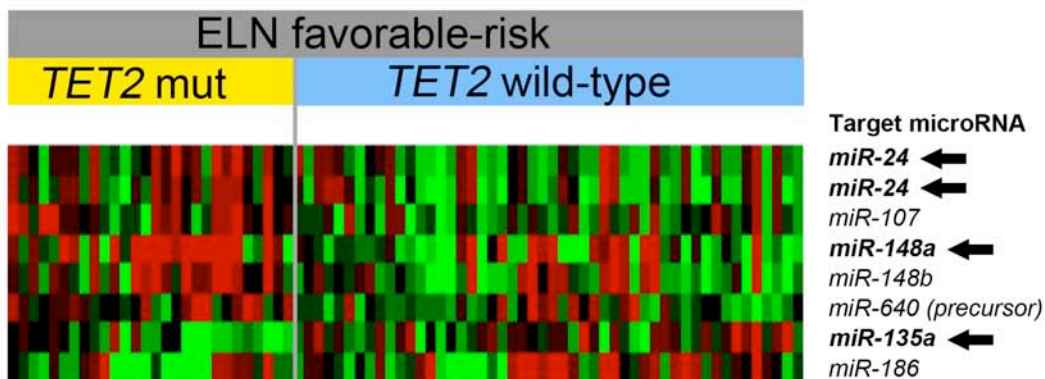

B

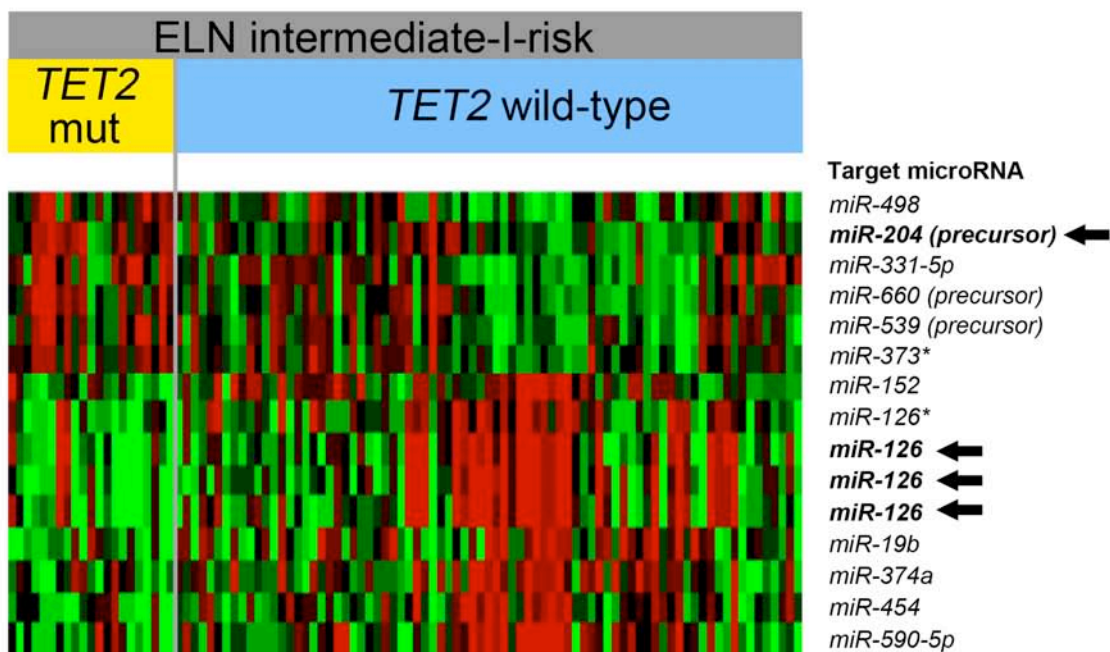

low      high

Expression



Figure A4

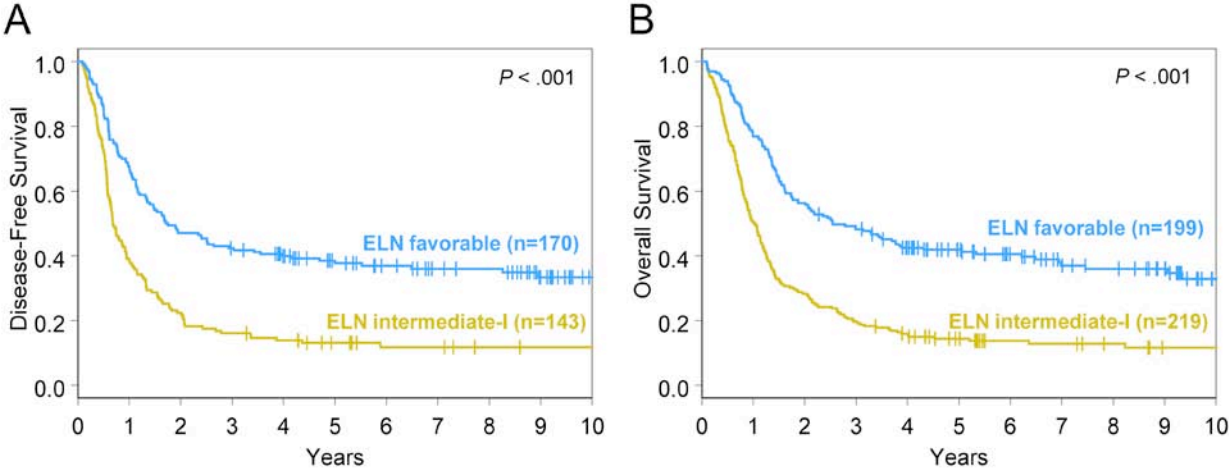

Figure A5

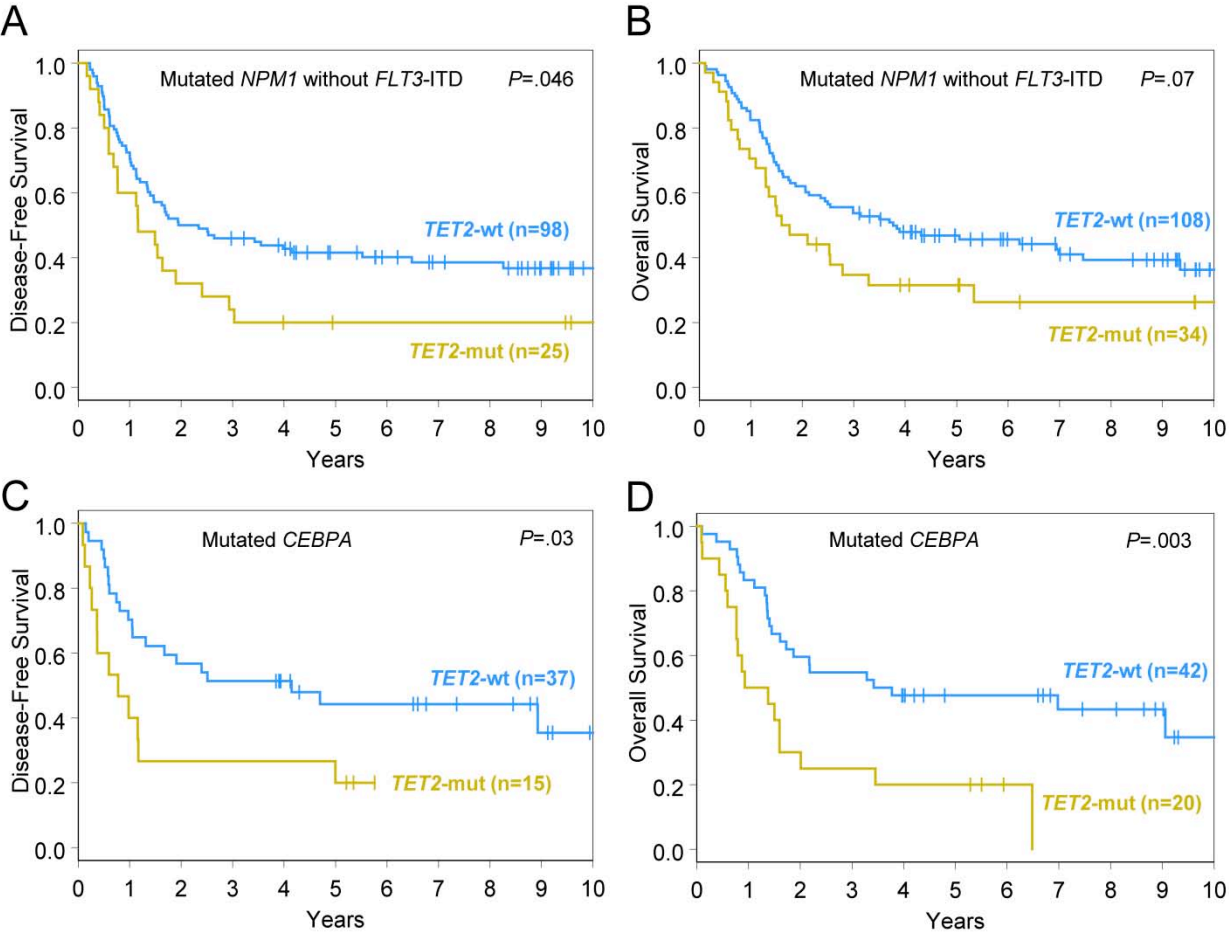

Figure A6

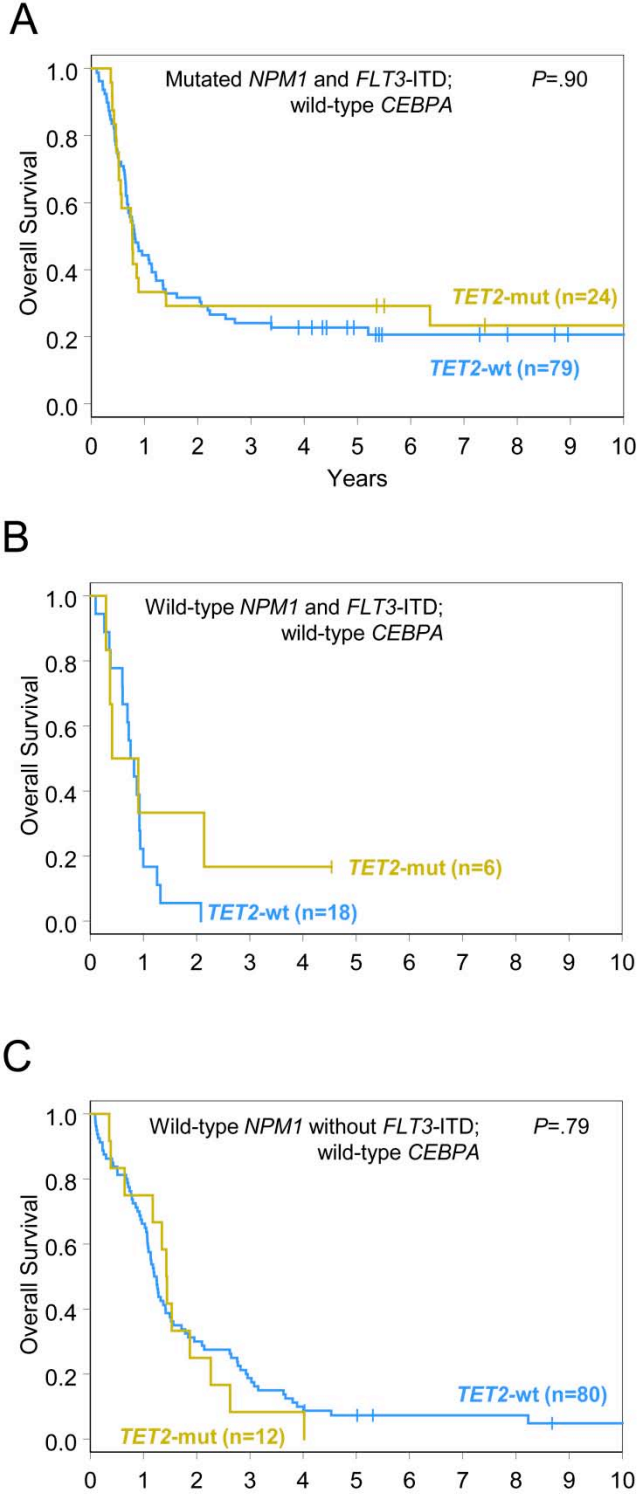

Supplement: supp_JCO.2010.32.7742_DataSupplement.pdf [file supp_JCO.2010.32.7742_DataSupplement.pdf]
